# Supplementary material
Source: publisher figshare collection journal article supplement (https://acs.figshare.com/ndownloader/files/24060769)
Supplement: Supplementary file 1 [file 24060769]

## Supporting Information

### **Generation of Stilbene Antimicrobials Against Multi-resistant Strains of *Staphylococcus aureus* Through Biotransformation by the Enzymatic Secretome of *Botrytis cinerea***

*Davide Righi,<sup>†,‡</sup> Robin Huber,<sup>†,‡</sup> Alexey Koval,<sup>‡</sup> Laurence Marcourt,<sup>†,‡</sup> Sylvain Schnee,<sup>§</sup> Anaïs Le Floch,<sup>†,‡</sup> Verena Ducret,<sup>^</sup> Remo Perozzo,<sup>†,‡</sup> Concetta C. de Ruvo,<sup>†,‡</sup> Nicole Lecoultré,<sup>§</sup> Emilie Michellod,<sup>§</sup> Samad N. Ebrahimi,<sup>||</sup> Elisabeth Rivara-Minten,<sup>†,‡</sup> Vladimir L. Katanaev,<sup>‡,∇</sup> Karl Perron,<sup>^</sup> Jean-Luc Wolfender,<sup>†,‡</sup> Katia Gindro,<sup>§</sup> and Emerson F. Queiroz,<sup>†,‡</sup>*

<sup>†</sup> School of Pharmaceutical Sciences, University of Geneva, CMU, Rue Michel Servet 1, 1211 Geneva 4, Switzerland

<sup>‡</sup> Institute of Pharmaceutical Sciences of Western Switzerland (ISPSW), University of Geneva, CMU, Rue Michel Servet 1, 1211 Geneva 4, Switzerland

<sup>‡</sup> Department of Cell Physiology and Metabolism, Translational Research Centre in Oncohaematology, Faculty of Medicine, CMU, Rue Michel Servet 1, 1211 Geneva 4, University of Geneva, Geneva, Switzerland

<sup>§</sup> Agroscope, Plant Protection Research Division, Mycology Group, Route de Duillier 50, P.O. Box 1012, 1260 Nyon, Switzerland

<sup>^</sup> Microbiological Analysis Platform, Microbiology Unit, Department of Botany and Plant Biology, University of Geneva, Quai Ernest-Ansermet 30, CH-1211 Geneva 4, Switzerland

<sup>||</sup> Department of Phytochemistry, Medicinal Plants and Drugs Research Institute, Shahid Beheshti University, G. C., Evin, Tehran, Iran

<sup>∇</sup> School of Biomedicine, Far Eastern Federal University, Vladivostok, Russia

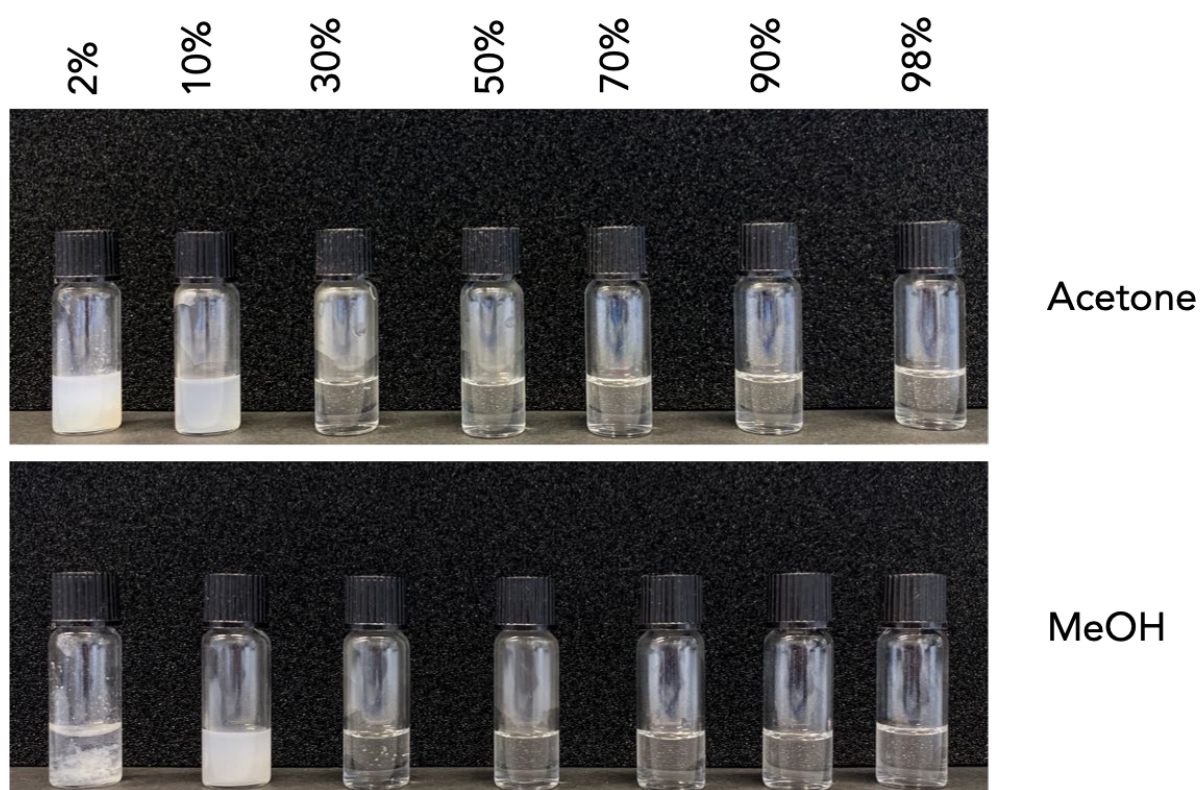

**Figure S1.** Solubility assays of resveratrol and pterostilbene in different solutions of water and acetone or methanol at the concentration of 0.5 mg/mL of each (1 mg/mL total).

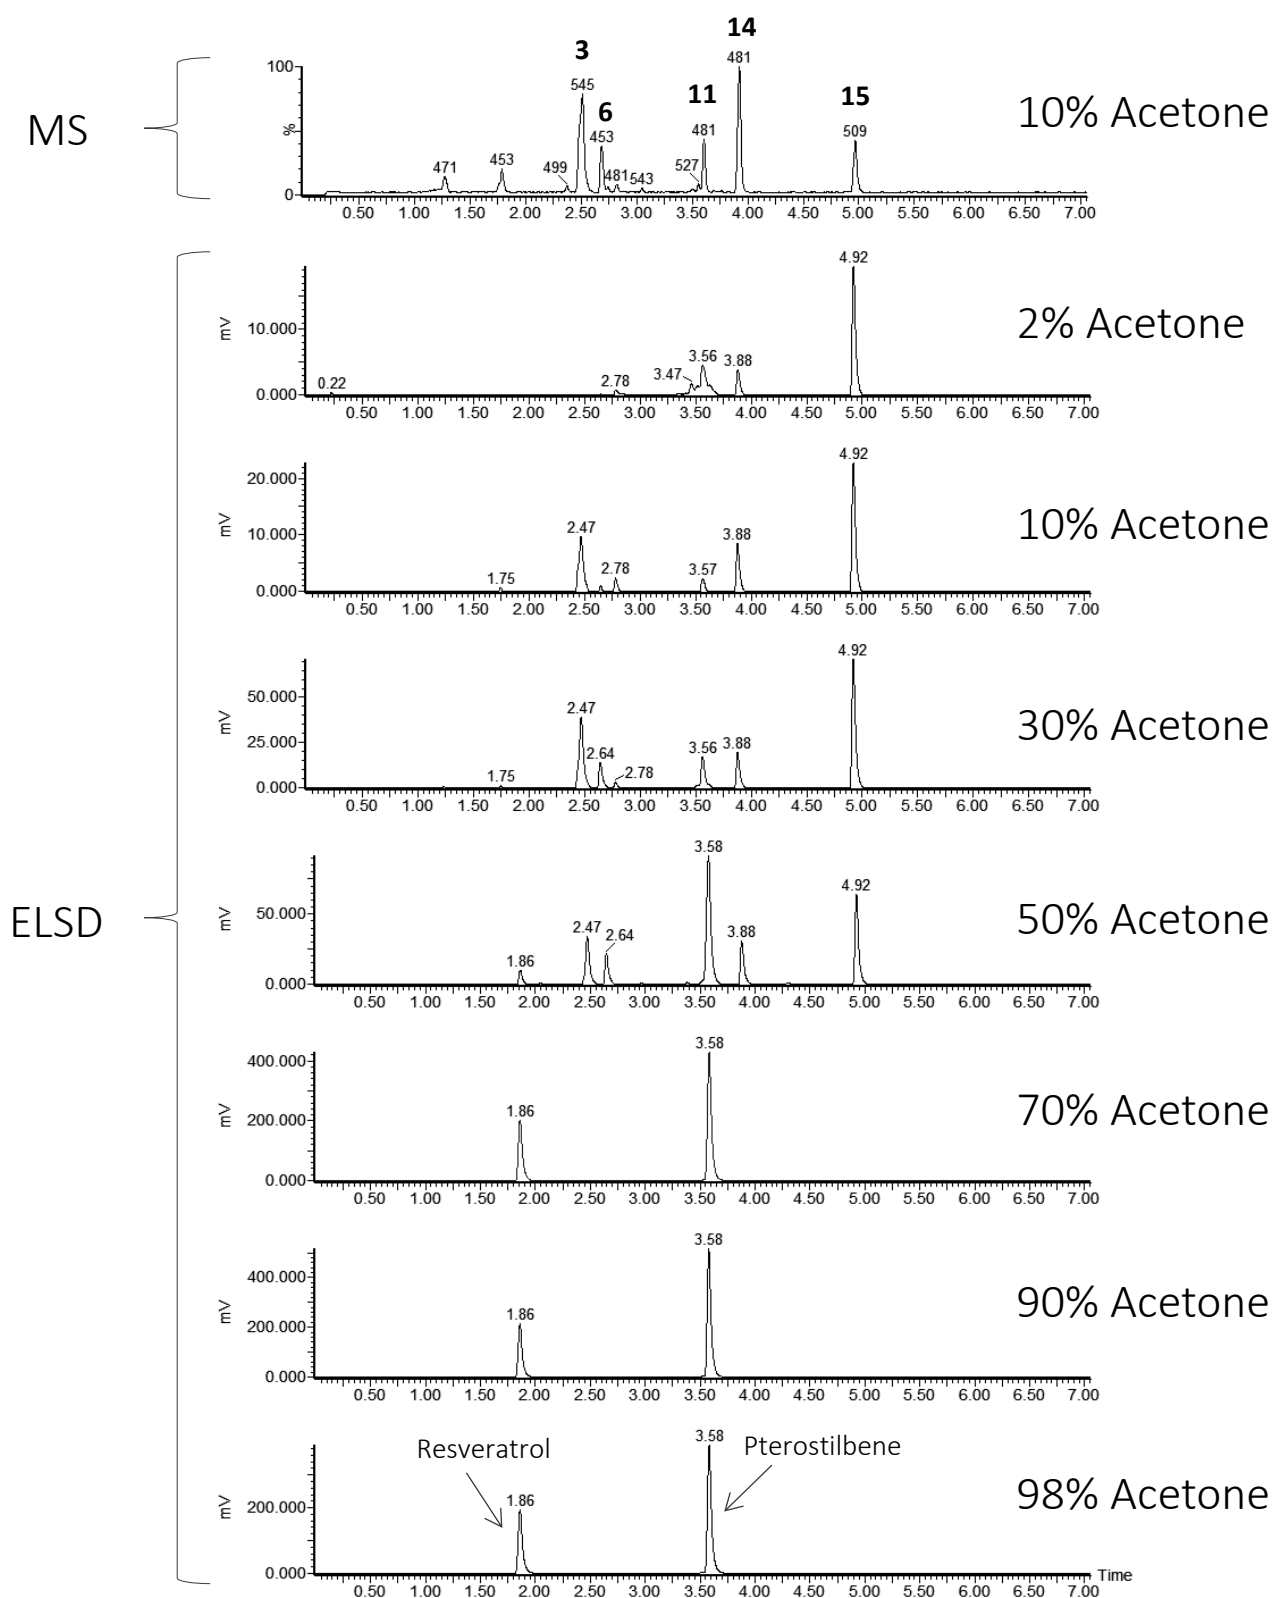

**Figure S2.** UHPLC-ELSD-QDa/MS analysis of the biotransformation reactions of the mixture of resveratrol and pterostilbene with the secretome of *B. cinerea* using different amounts acetone as co-solvents after 24 hours.

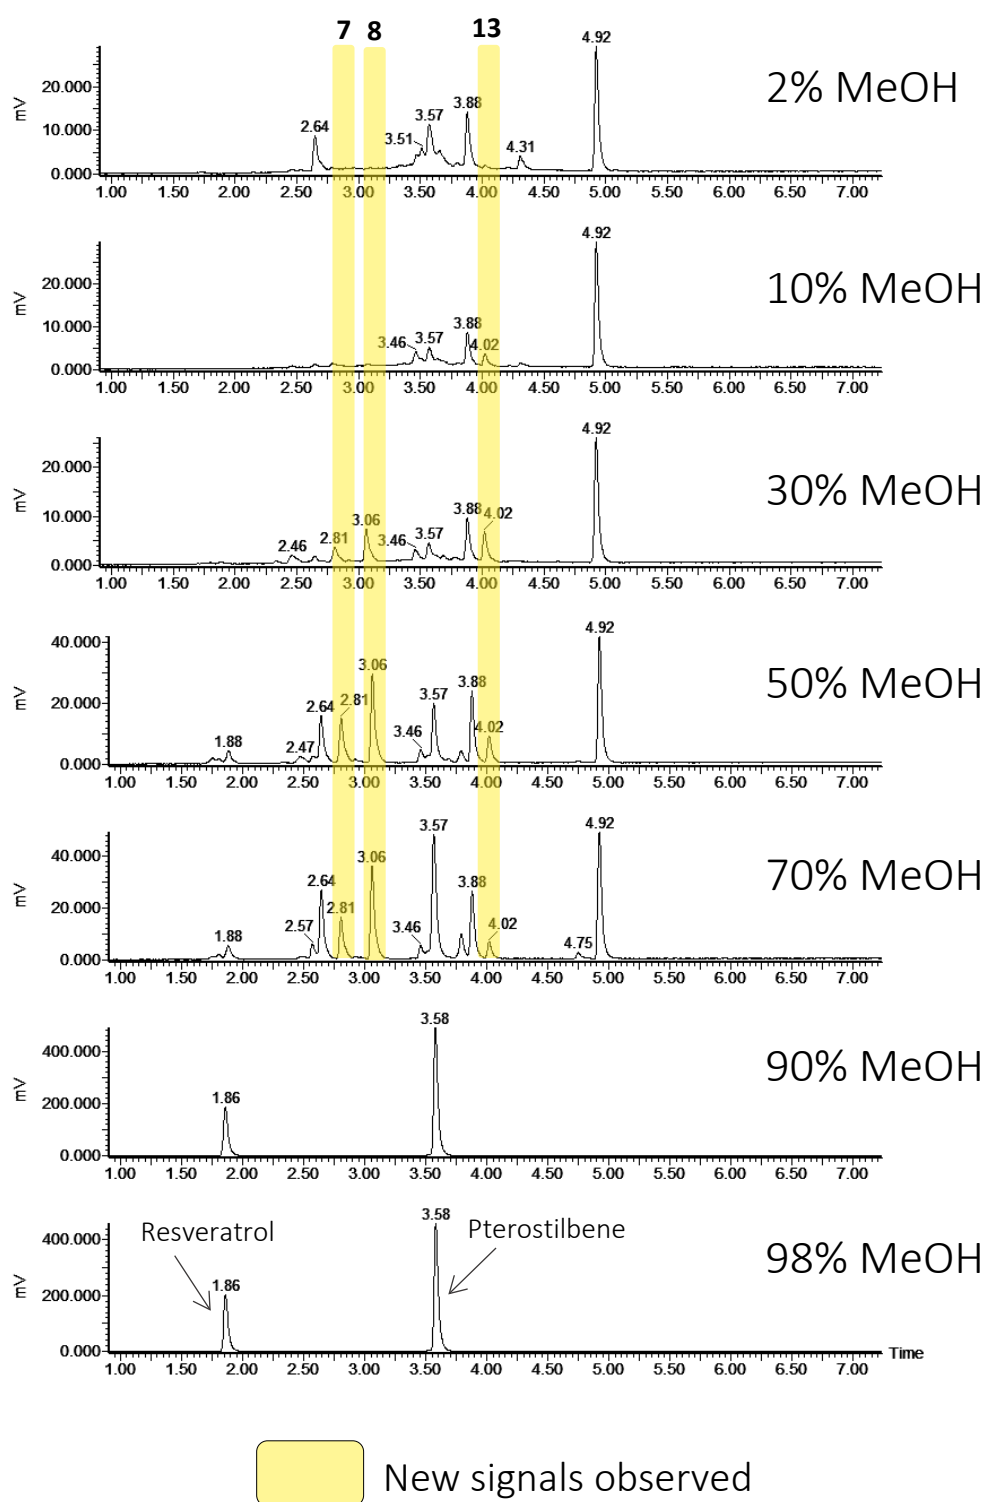

**Figure S3.** UHPLC-ELSD analysis of the biotransformation reactions of the mixture of resveratrol and pterostilbene with the secretome of *B. cinerea* using different amounts methanol as co-solvents after 24 hours. In yellow is highlighted the new signals obtained in the reactions performed with the methanol.

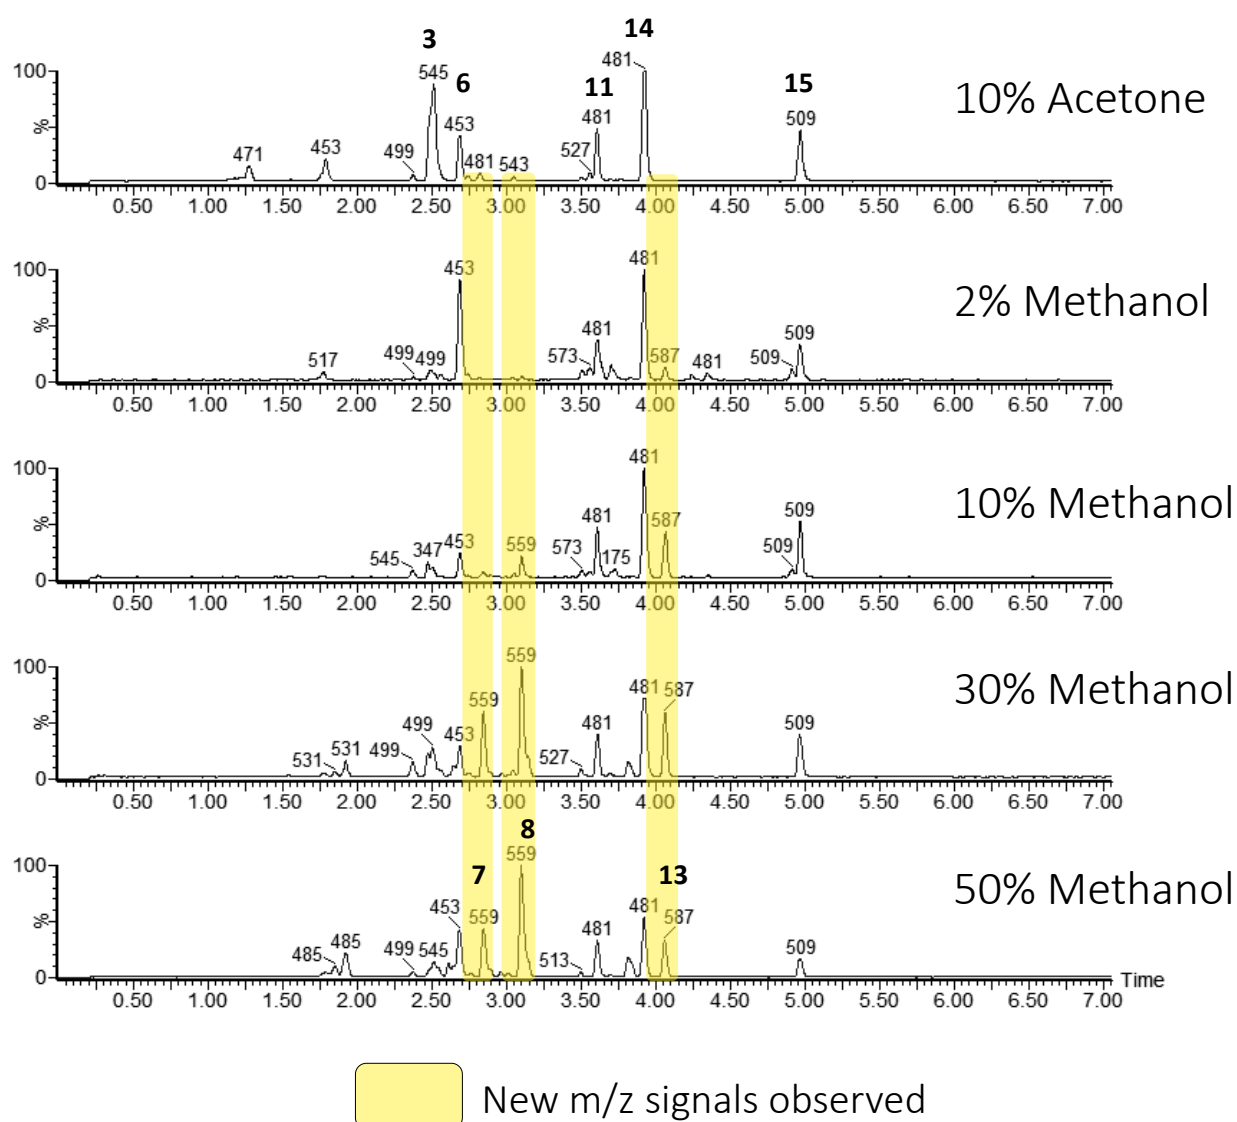

**Figure S4.** UHPLC-QDa/MS analysis of the biotransformation reactions of the mixture of resveratrol and pterostilbene with the secretome of *B. cinerea* using acetone and different amounts methanol as co-solvents after 24 hours. In yellow is highlighted the new  $m/z$  signals obtained in the reactions performed with the methanol.

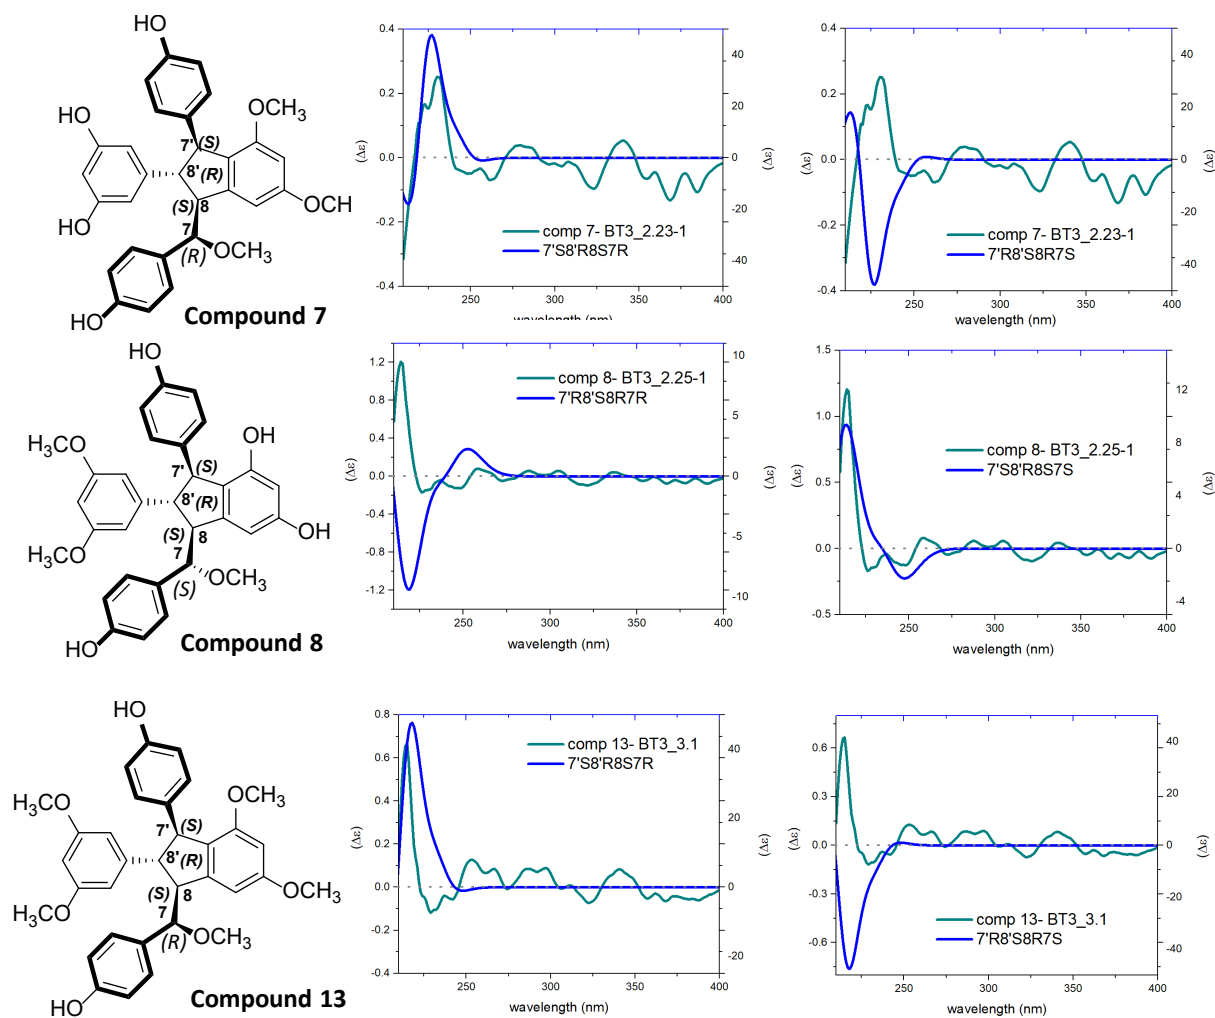

**Figure S5.** Experimental and TDDF calculated ECD spectra for the stereoisomers of compounds 7, 8, and 13 at the CAM-B3LYP/6-31G\*\* level with MeCN as a solvent.

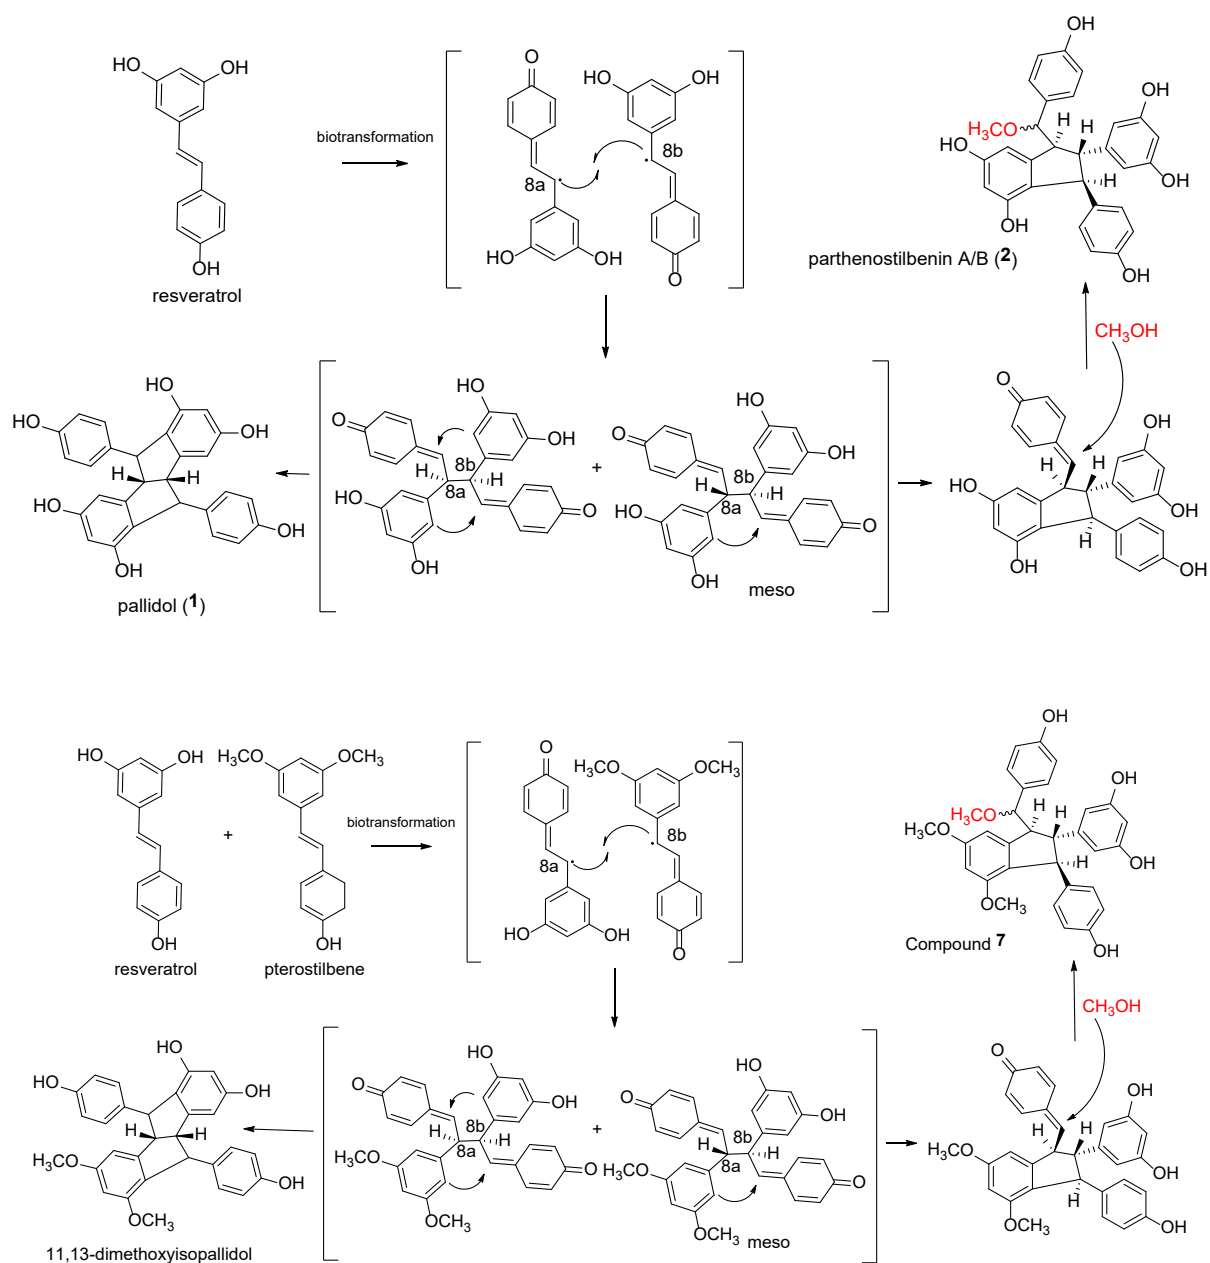

**Figure S6.** Proposal mechanism for the biosynthesis of compound **1**, **2** and **7**.

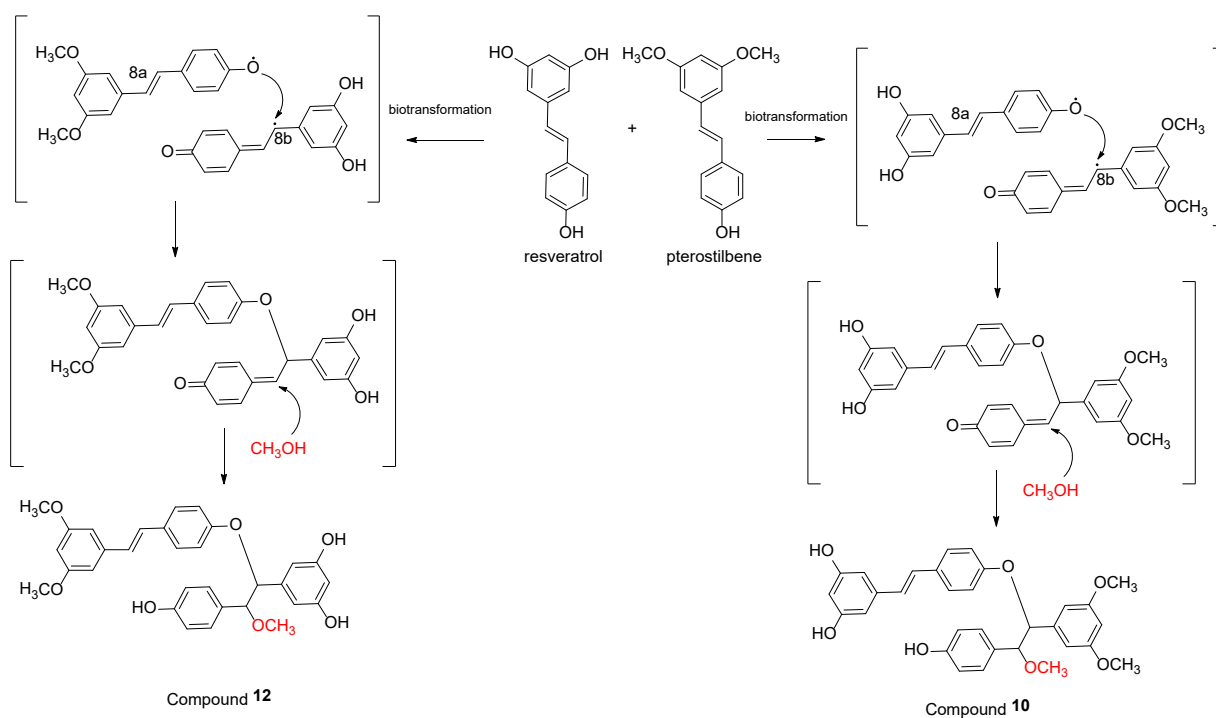

**Figure S7.** Proposal mechanism for the biosynthesis of compound 10 and 12.

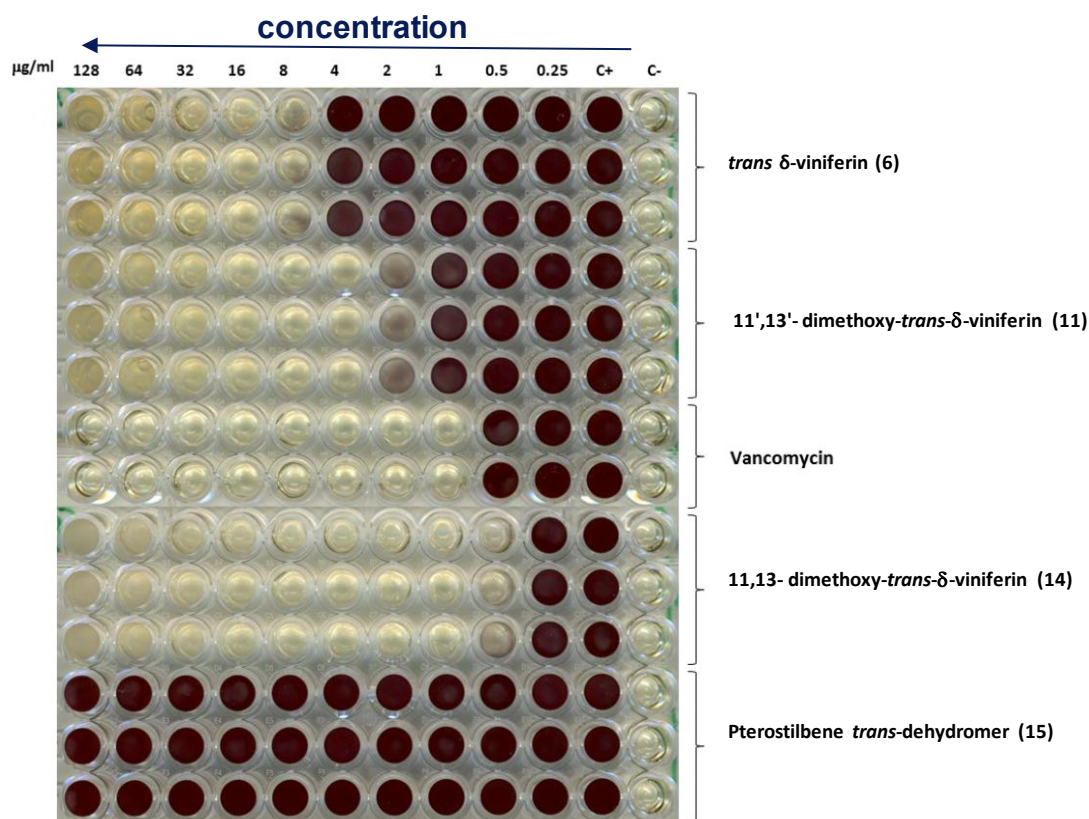

**Figure S8.** 96 well plate showing the minimum inhibitory concentration (MIC) of the compounds 6, 11, 14 and 15 against *Staphylococcus aureus* (MRSA 33591).

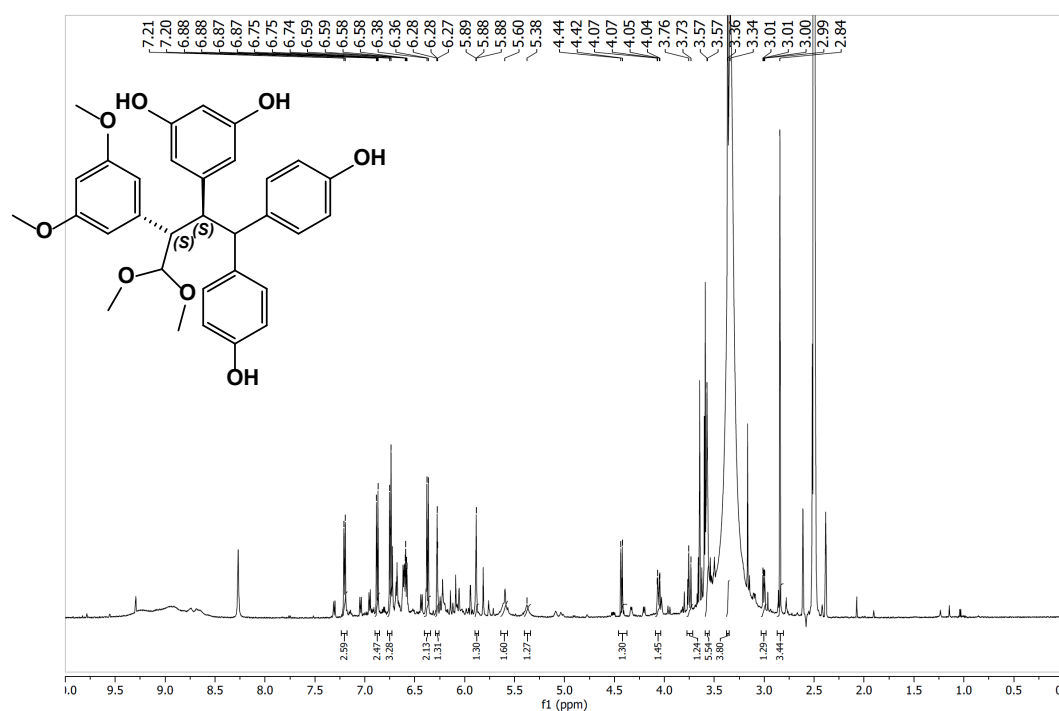

**Figure S9.**  $^1\text{H}$  NMR spectrum of compound 4 in  $\text{DMSO}-d_6$  at 600 MHz

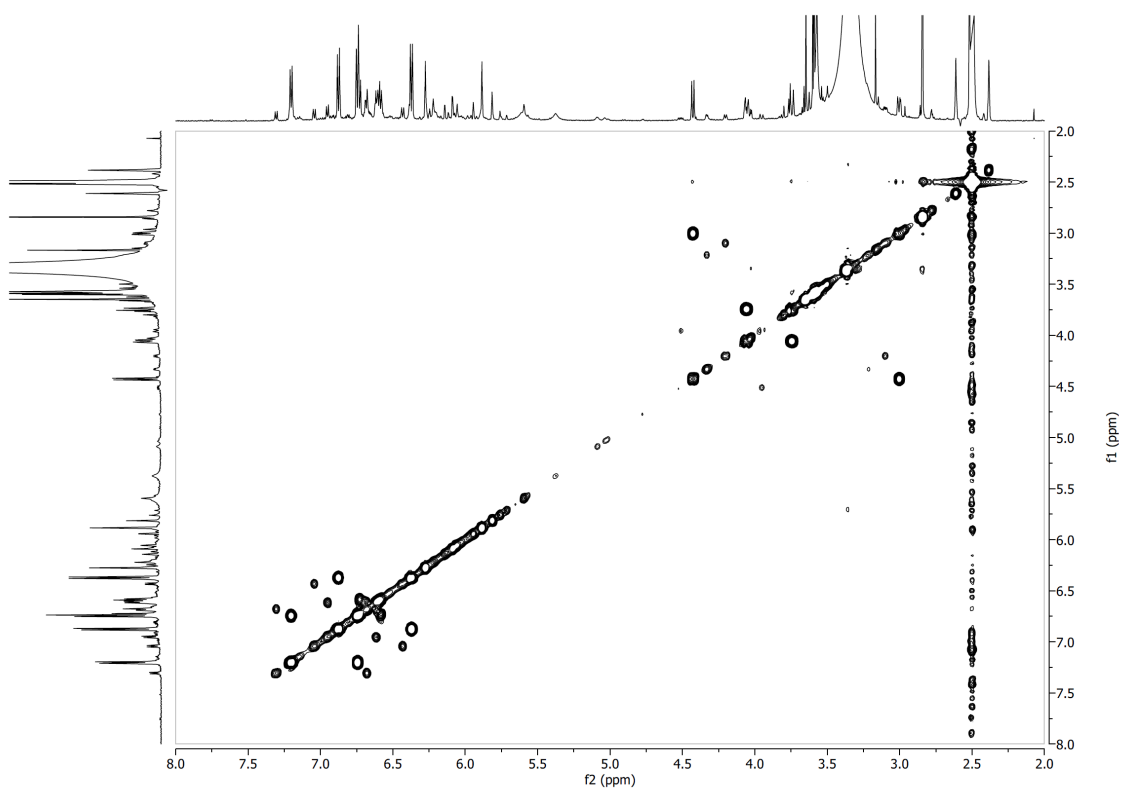

**Figure S10.** COSY NMR spectrum of compound **4** in DMSO- $d_6$

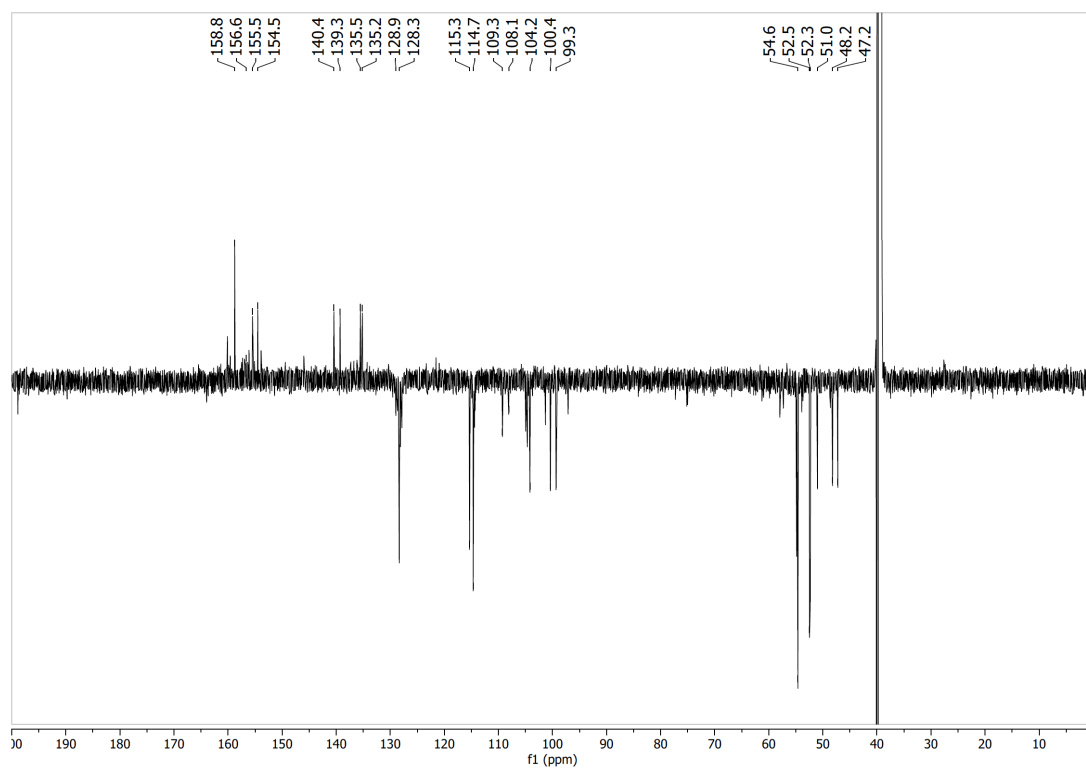

**Figure S11.**  $^{13}\text{C}$ -DEPTQ NMR spectrum of compound **4** in DMSO- $d_6$  at 151 MHz

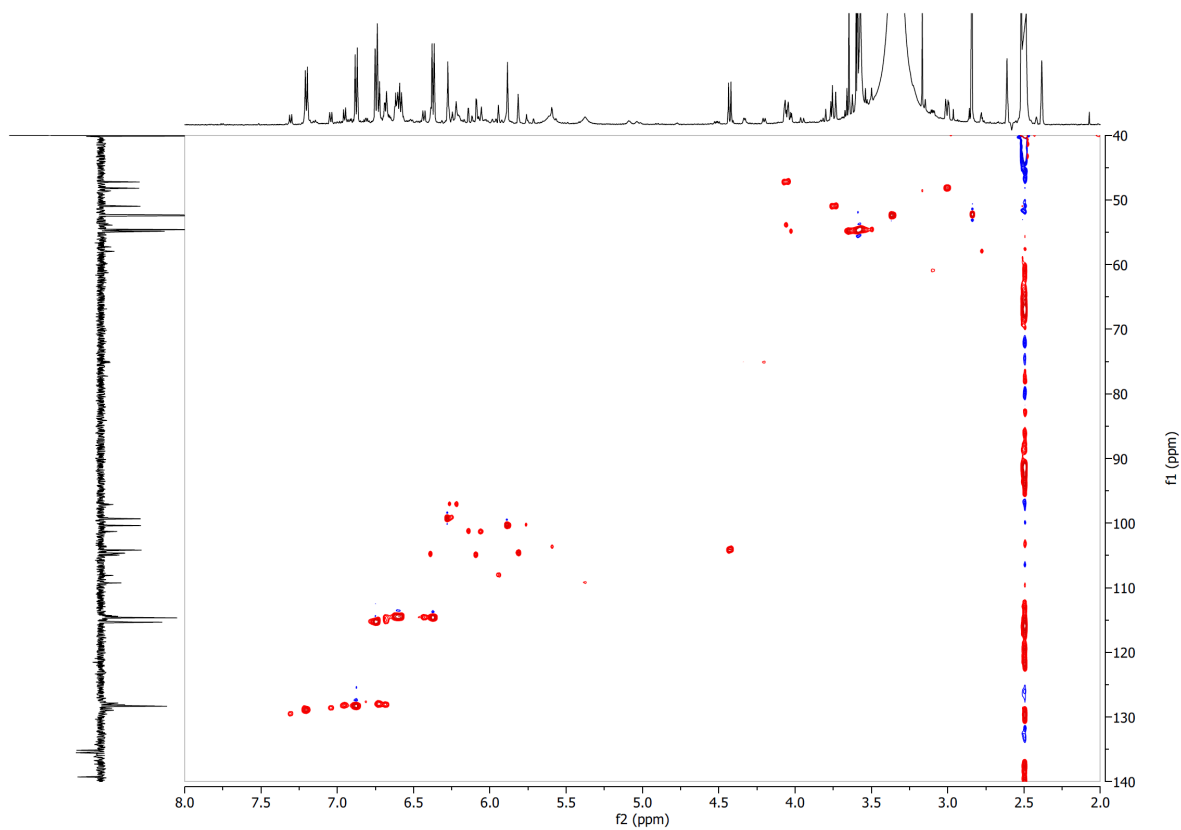

**Figure S12.** Edited-HSQC NMR spectrum of compound **4** in DMSO- $d_6$

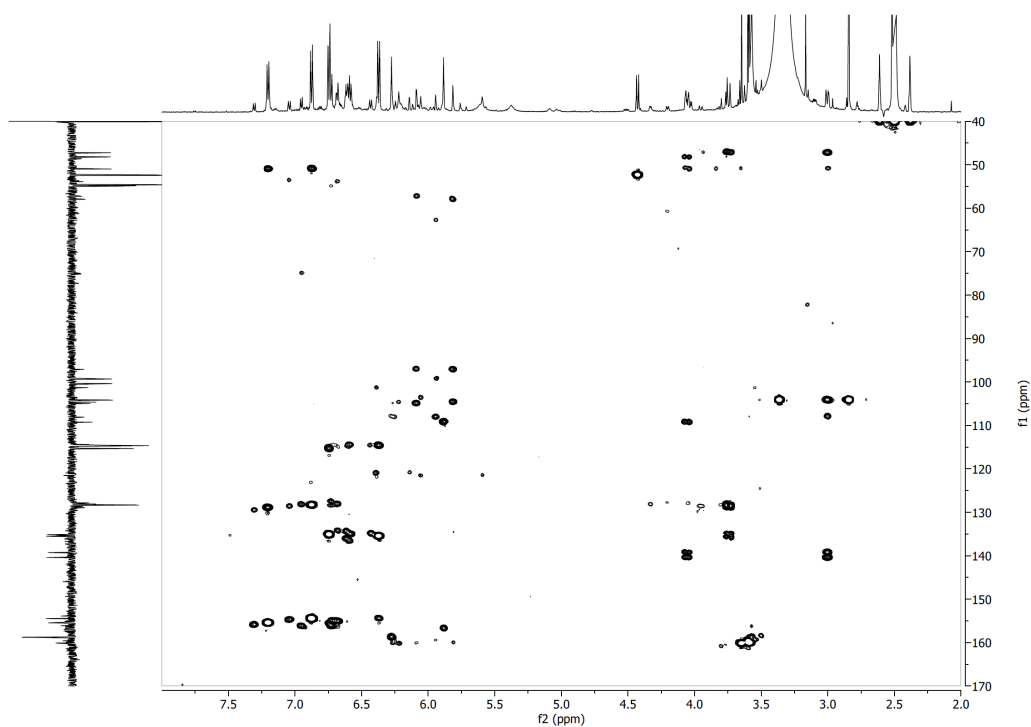

**Figure S13.** HMBC NMR spectrum of compound **4** in DMSO- $d_6$

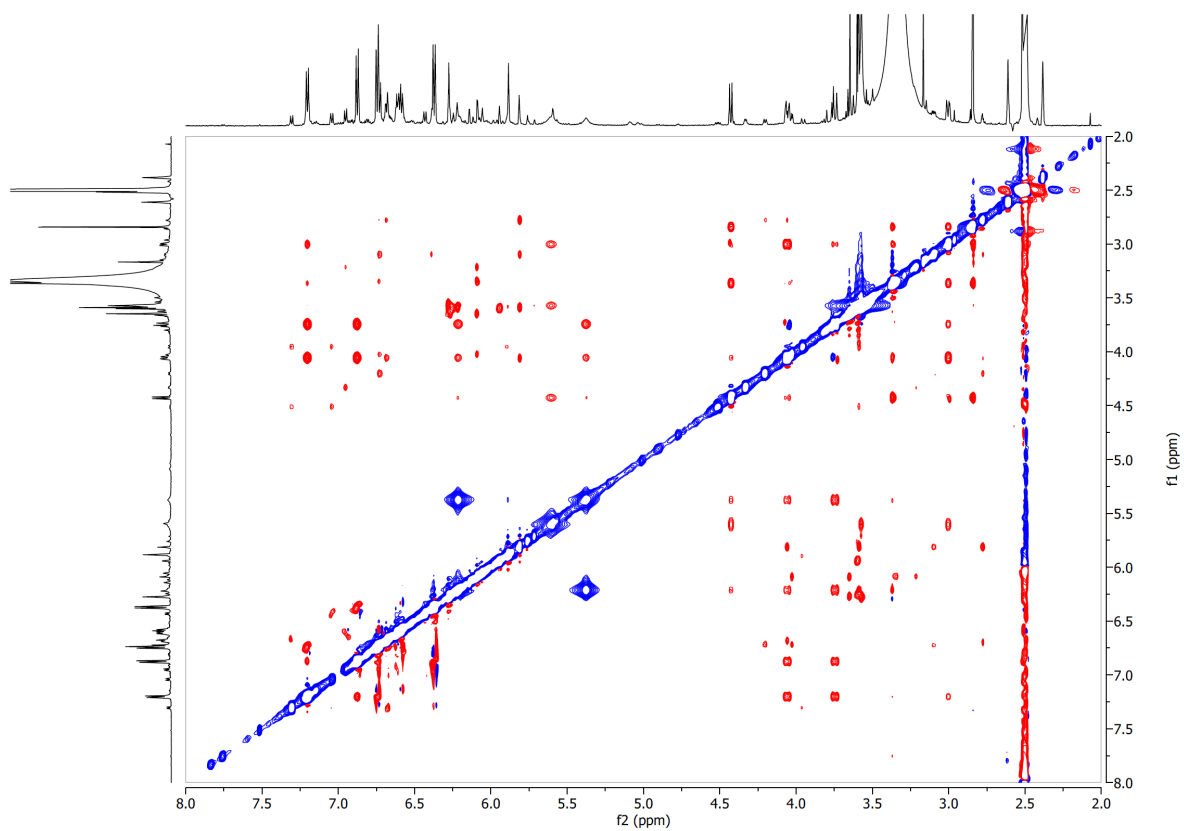

**Figure S14.** ROESY NMR spectrum of compound **4** in DMSO- $d_6$

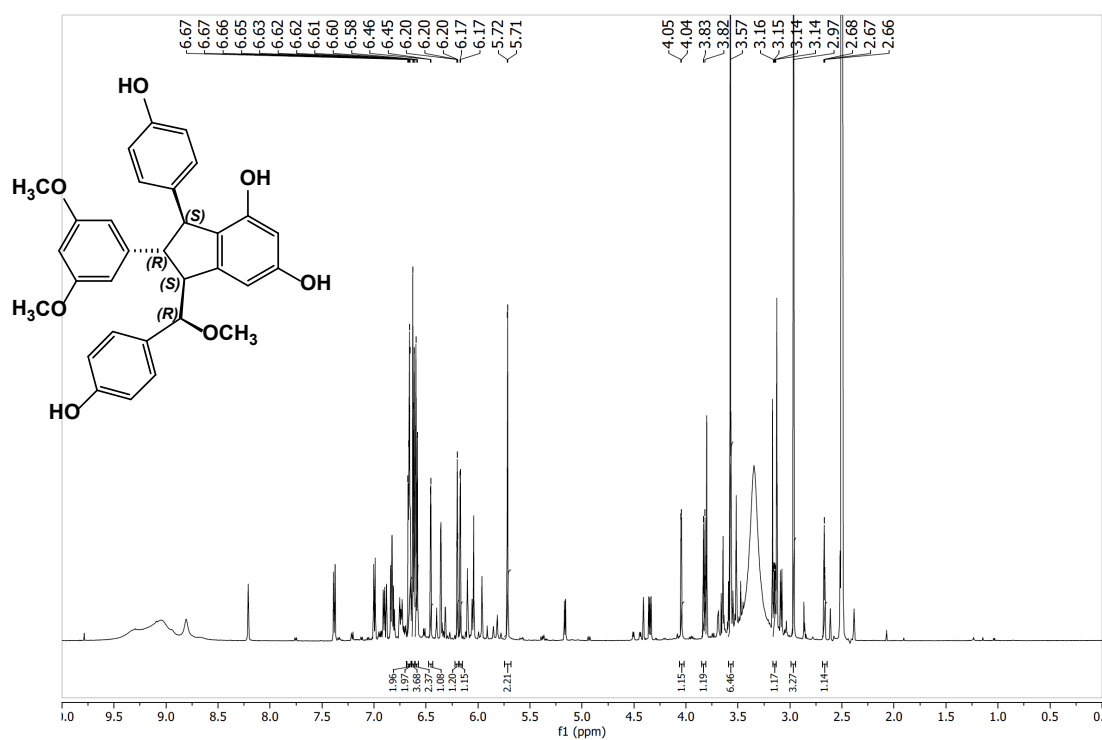

Figure S15.  $^1\text{H}$  NMR spectrum of compound 5 in  $\text{DMSO}-d_6$  at 600 MHz

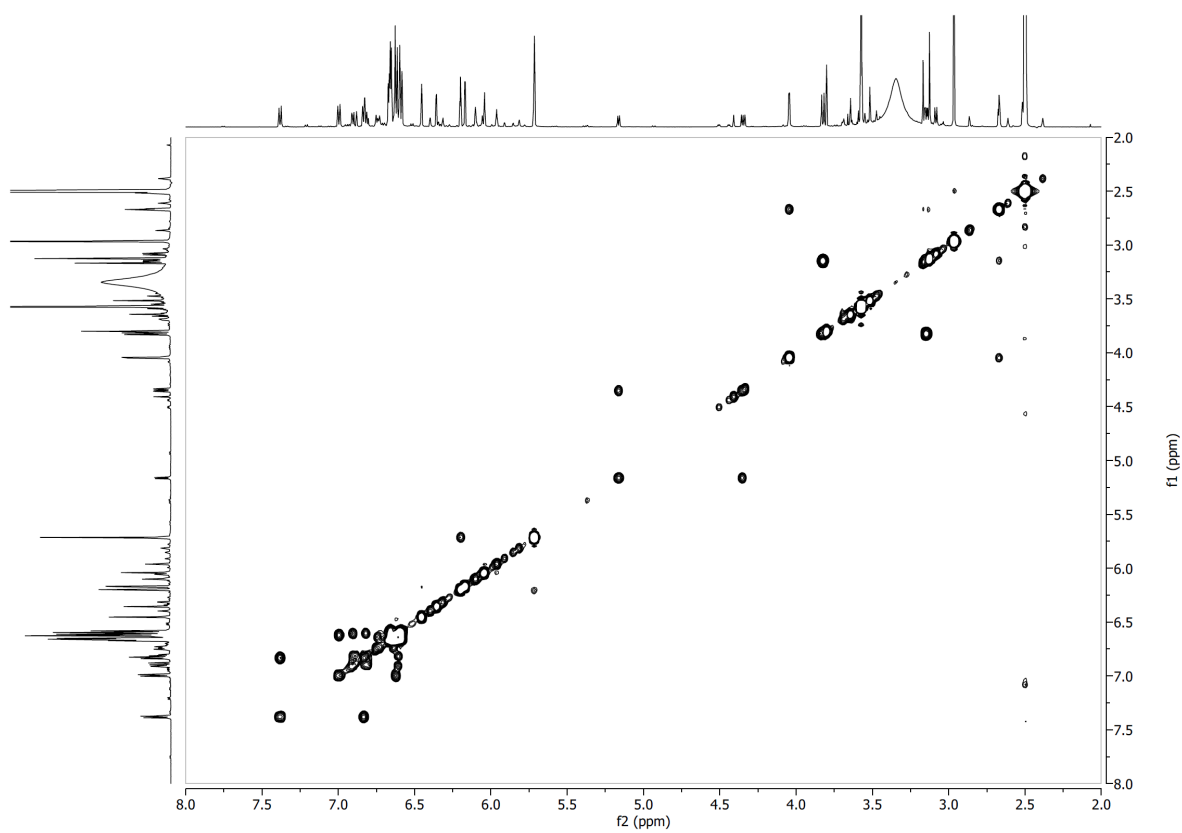

Figure S16. COSY NMR spectrum of compound 5 in  $\text{DMSO}-d_6$

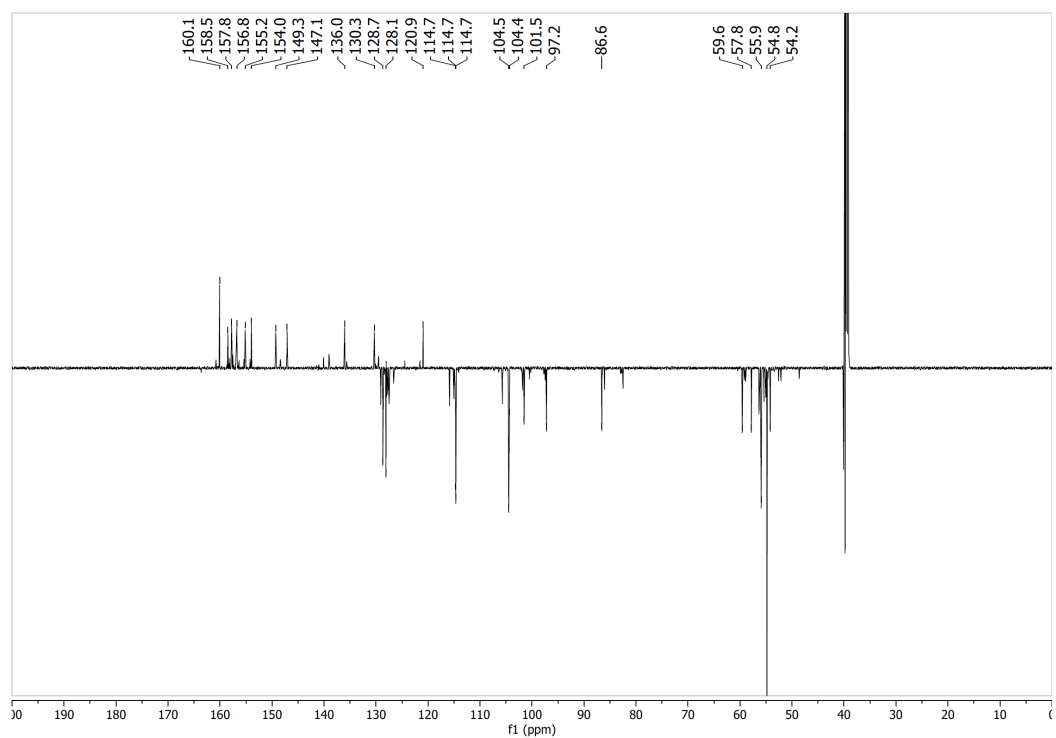

**Figure S17.**  $^{13}\text{C}$ -DEPTQ NMR spectrum of compound **5** in  $\text{DMSO-}d_6$  at 151 MHz

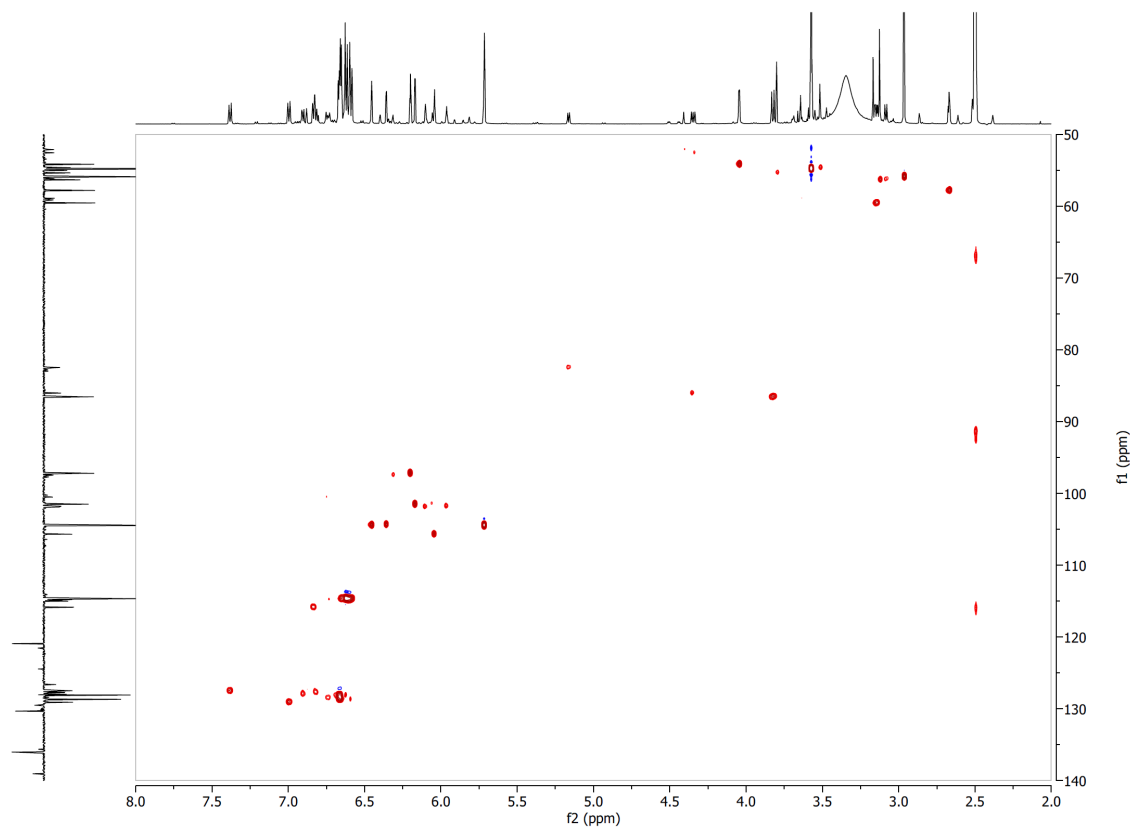

**Figure S18.** Edited-HSQC NMR spectrum of compound **5** in  $\text{DMSO-}d_6$

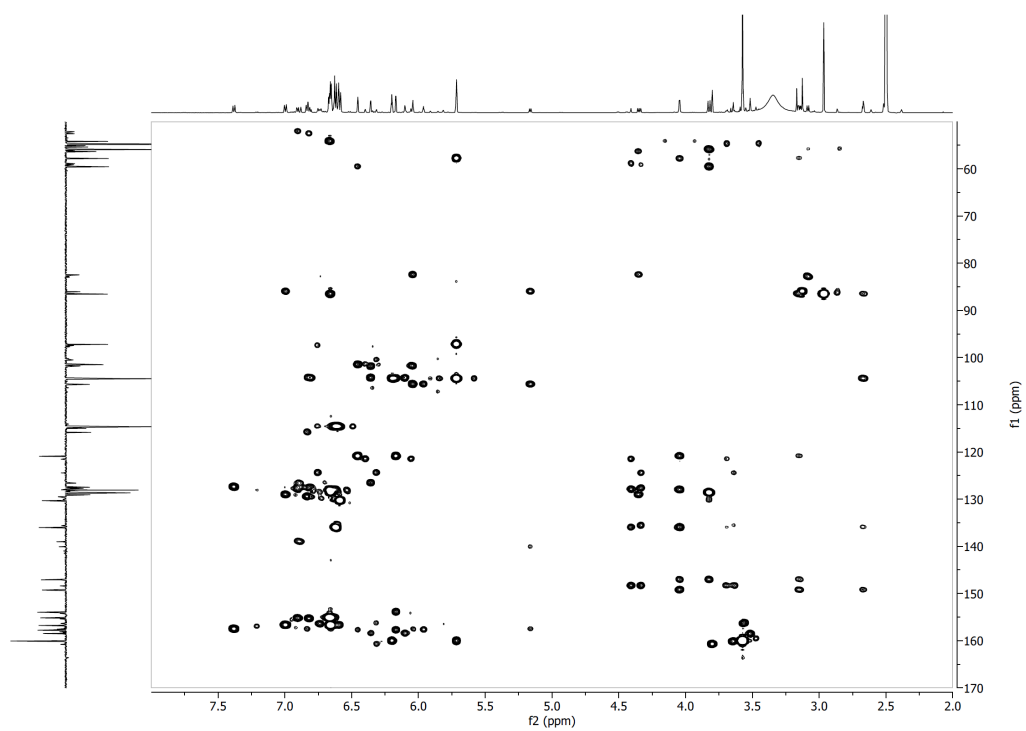

**Figure S19.** HMBC NMR spectrum of compound **5** in DMSO- $d_6$

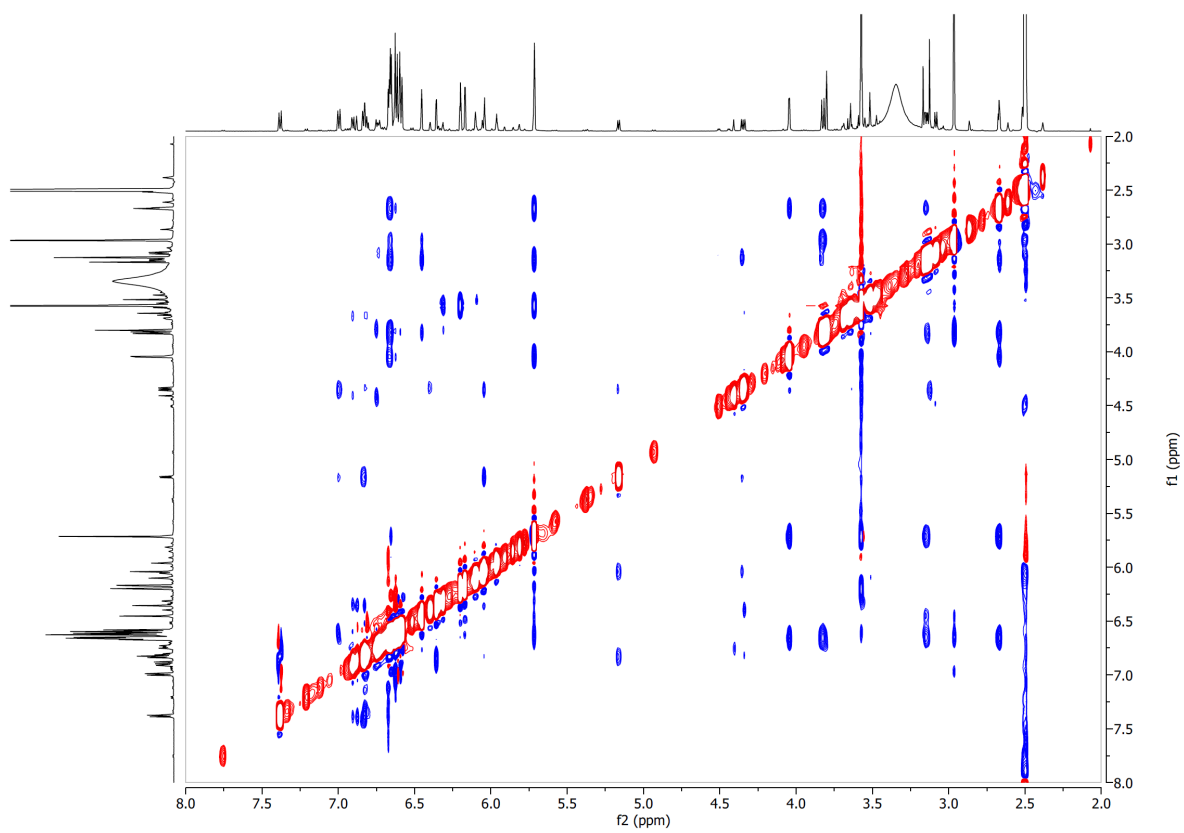

**Figure S20.** ROESY NMR spectrum of compound **5** in DMSO- $d_6$

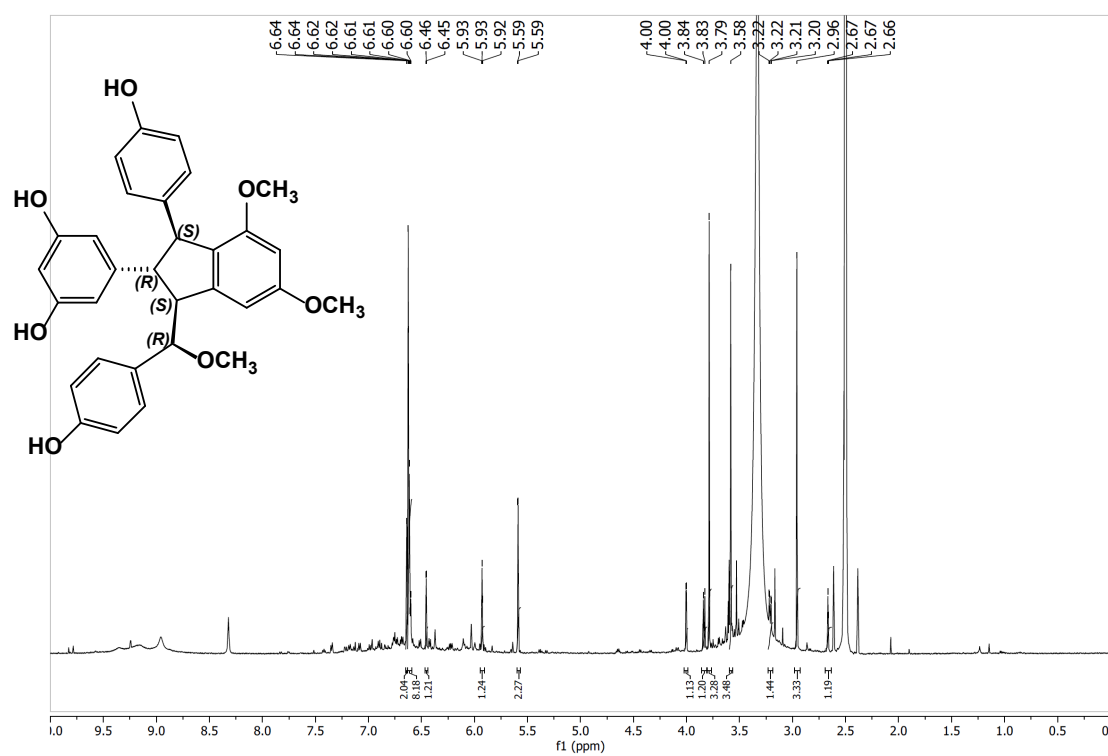

**Figure S21.**  $^1\text{H}$  NMR spectrum of compound **7** in  $\text{DMSO}-d_6$  at 600 MHz

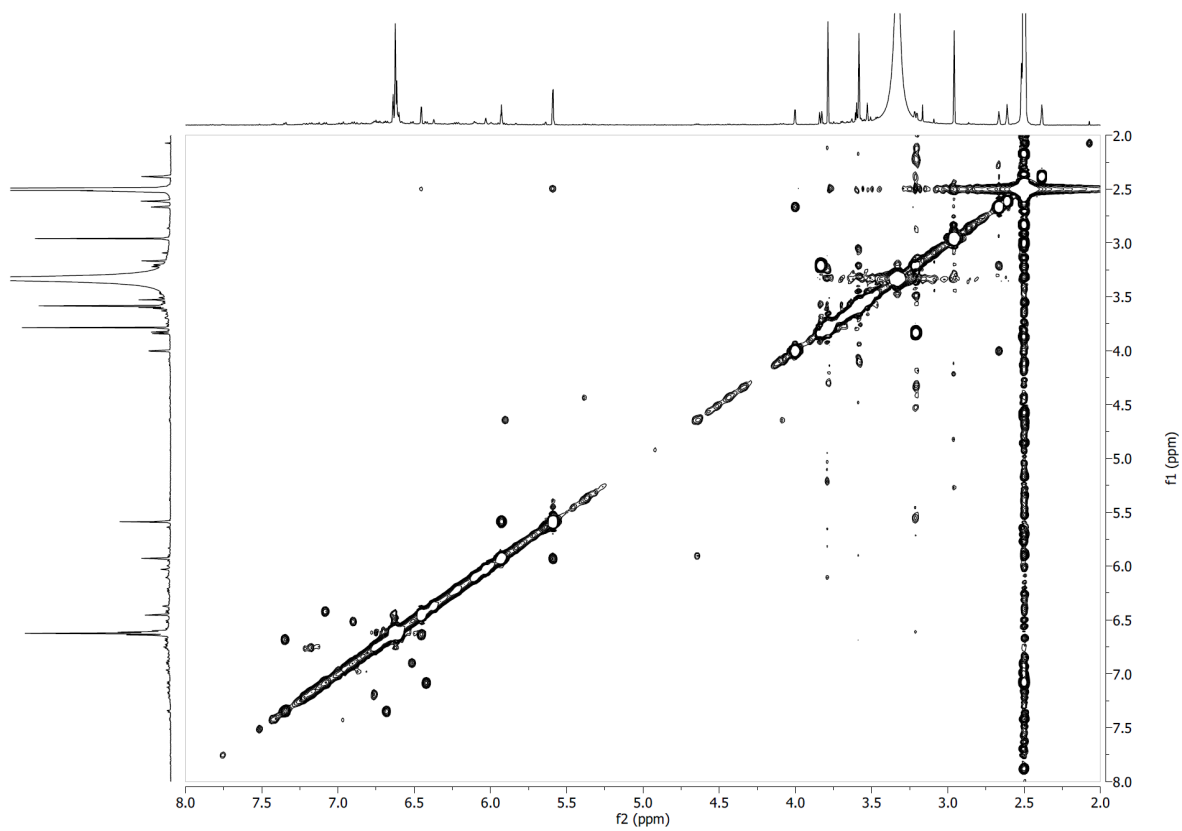

**Figure S22.** COSY NMR spectrum of compound **7** in  $\text{DMSO}-d_6$

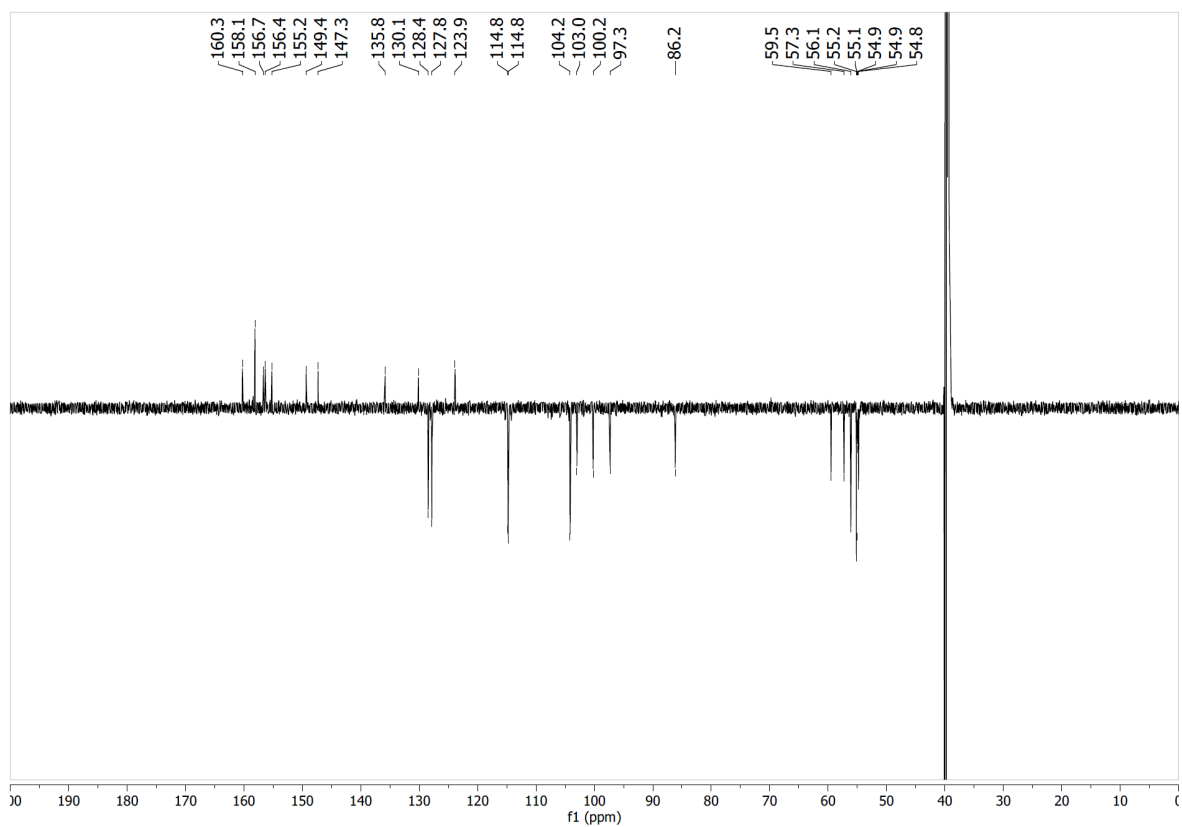

**Figure S23.**  $^{13}\text{C}$ -DEPTQ NMR spectrum of compound **7** in  $\text{DMSO}-d_6$  at 151 MHz

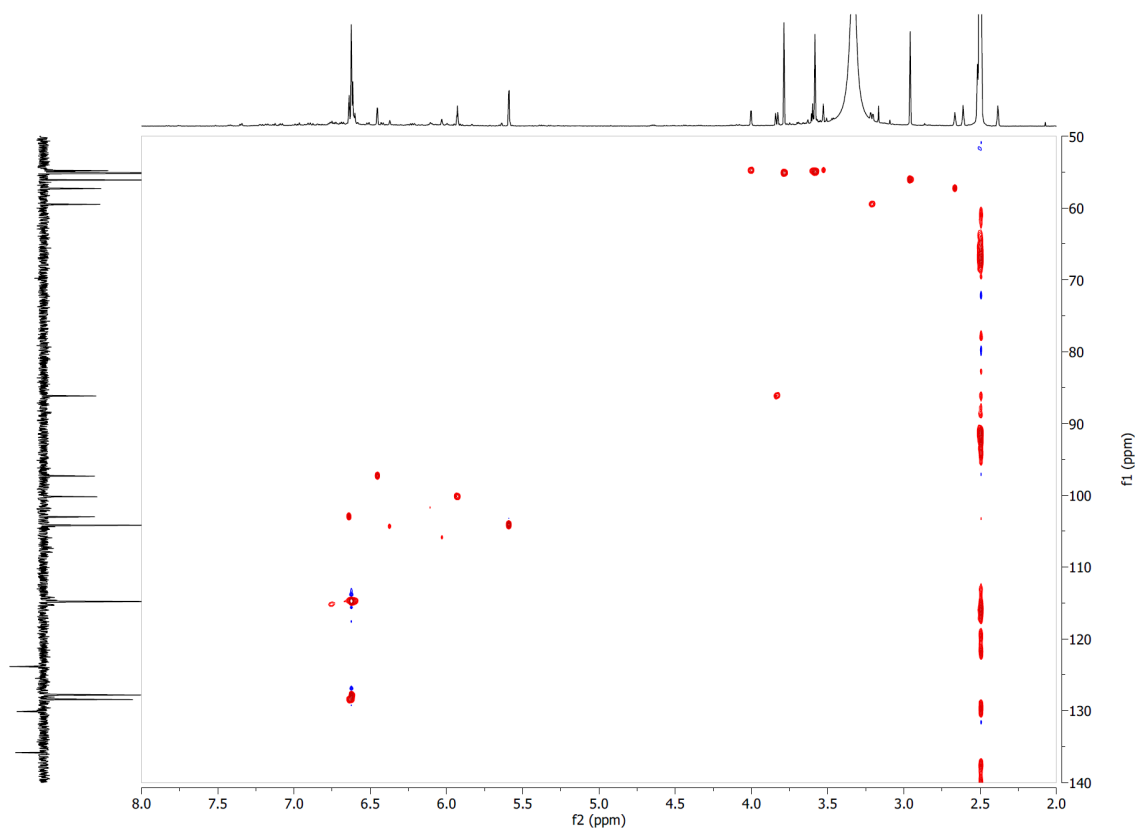

**Figure S24.** Edited-HSQC NMR spectrum of compound **7** in  $\text{DMSO}-d_6$

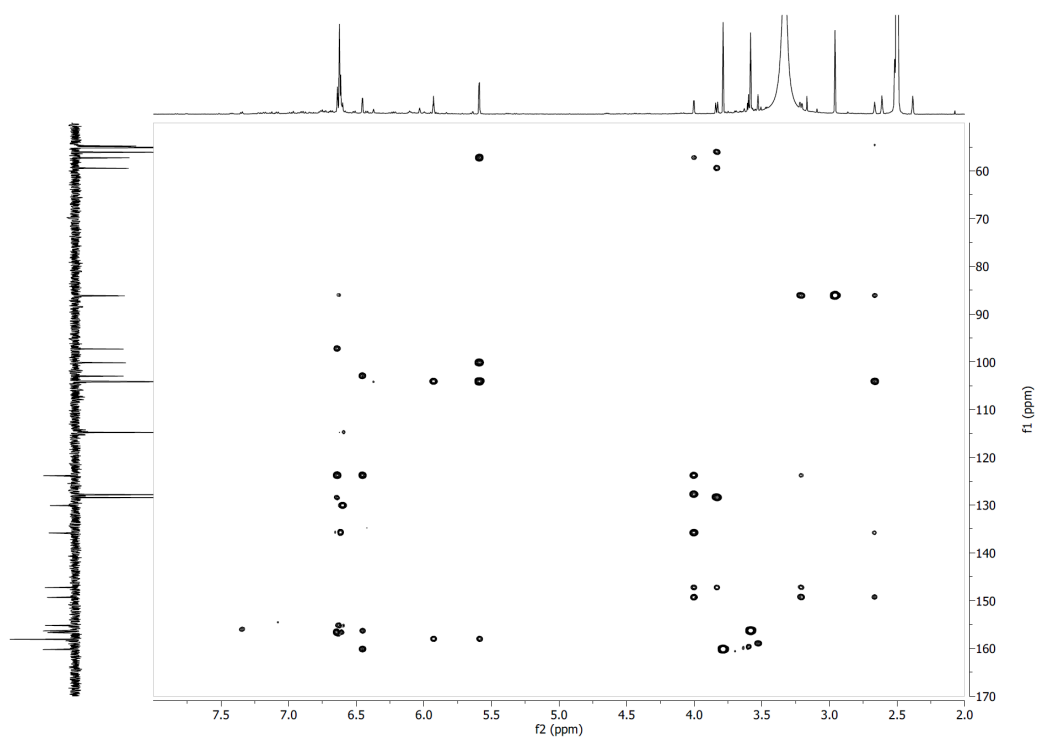

**Figure S25.** HMBC NMR spectrum of compound **7** in DMSO- $d_6$

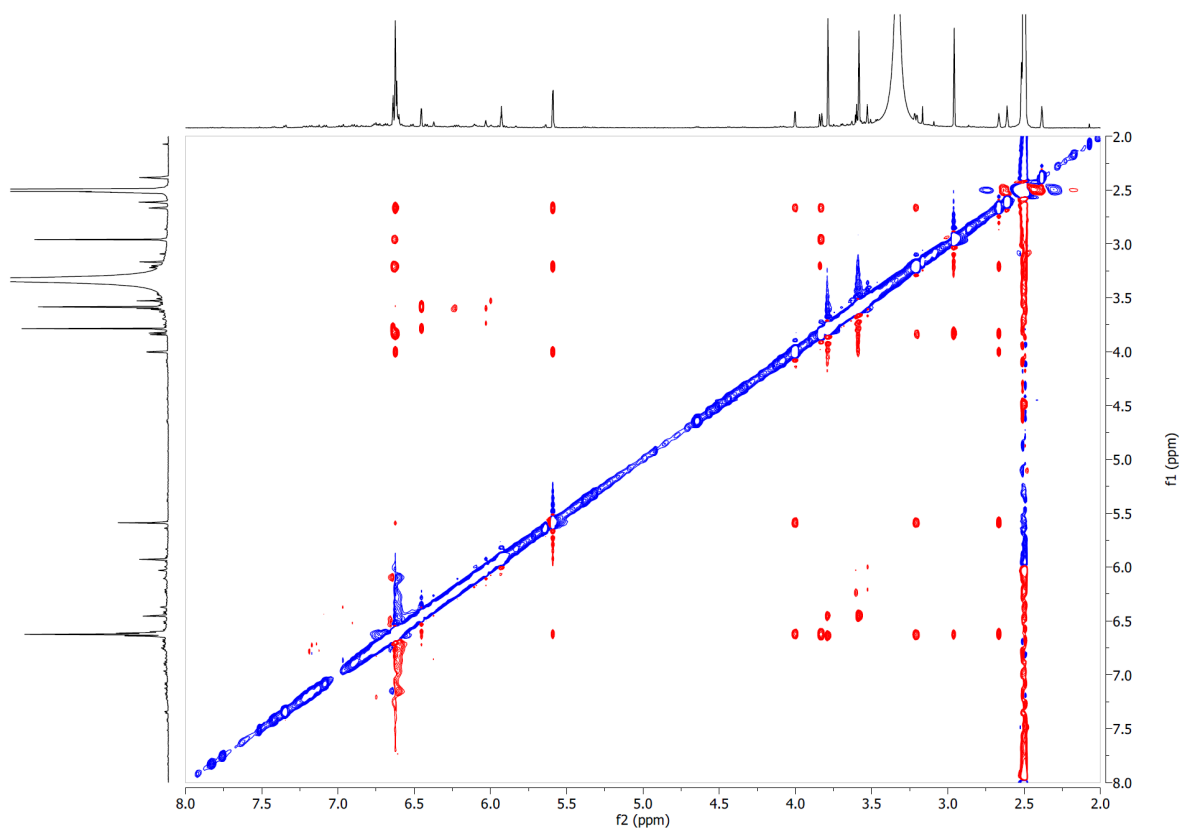

**Figure S26.** ROESY NMR spectrum of compound **7** in DMSO- $d_6$

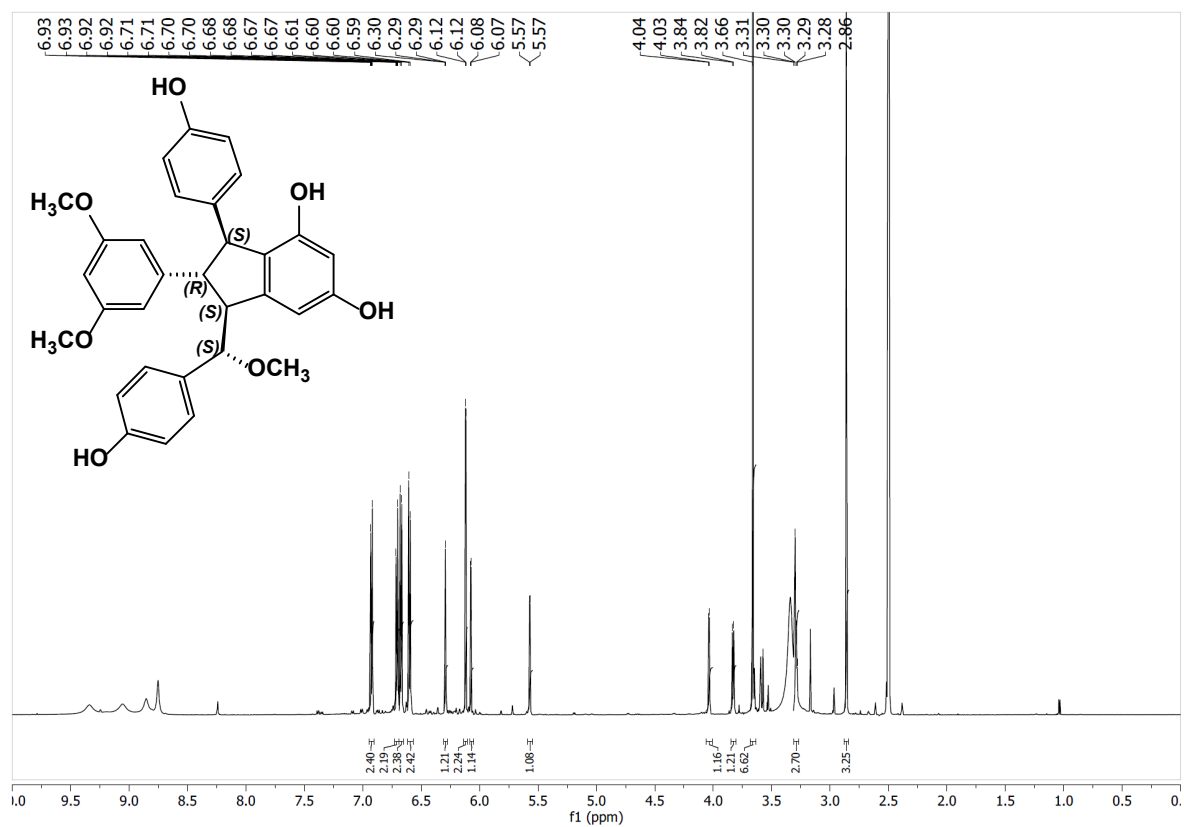

**Figure S27.** <sup>1</sup>H NMR spectrum of compound **8** in DMSO-*d*<sub>6</sub> at 600 MHz

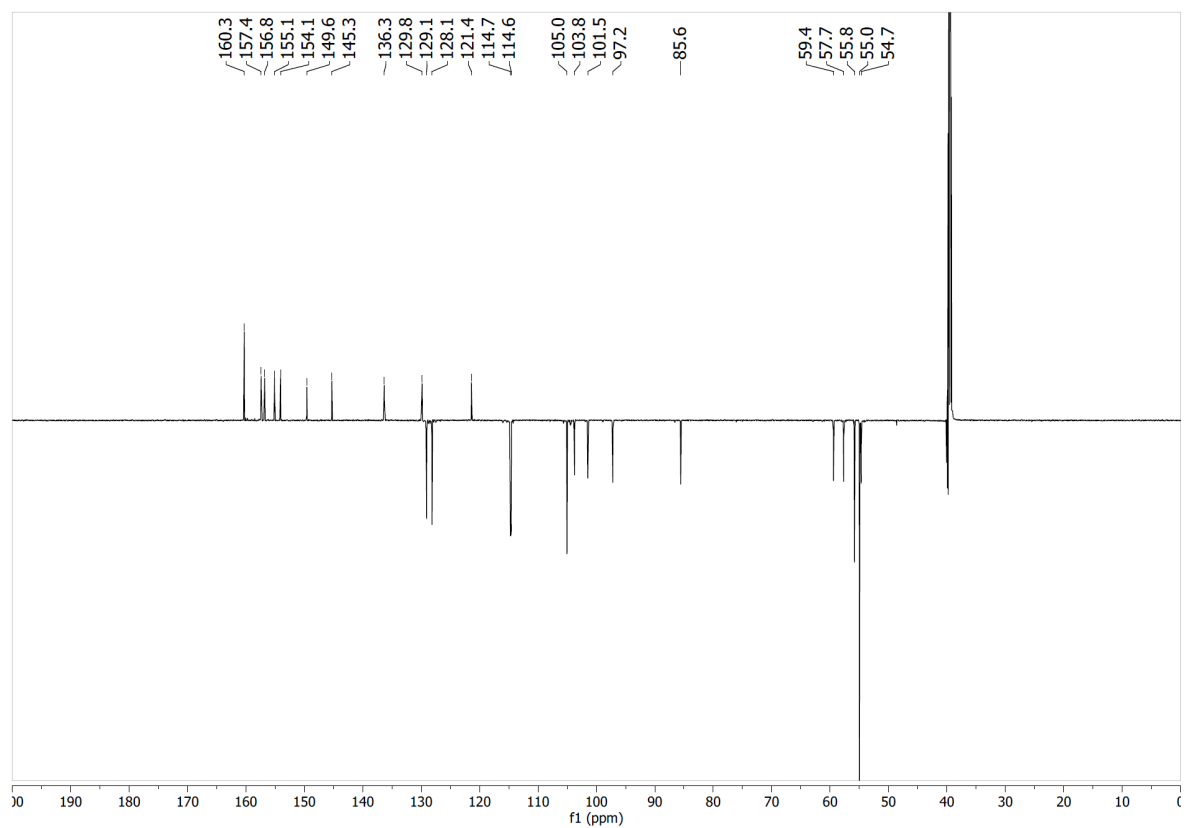

**Figure S28.** <sup>13</sup>C-DEPTQ NMR spectrum of compound **8** in DMSO-*d*<sub>6</sub> at 151 MHz

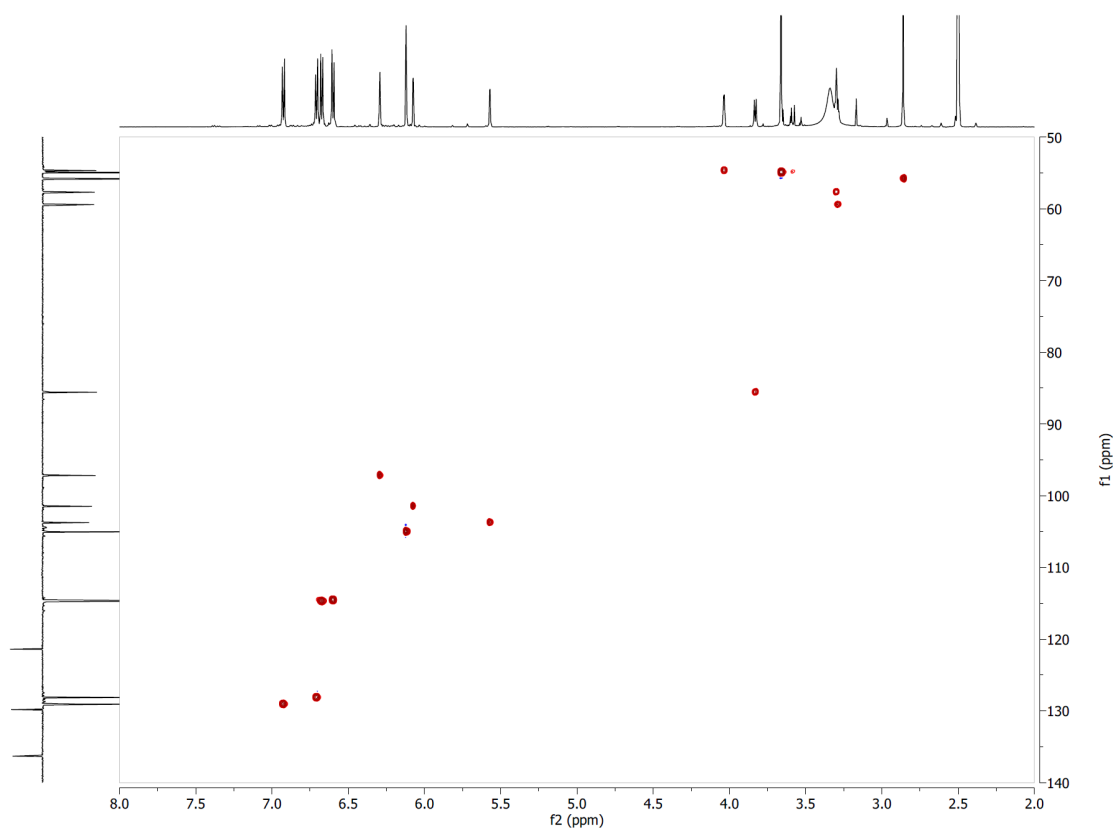

**Figure S29.** Edited-HSQC NMR spectrum of compound **8** in DMSO- $d_6$

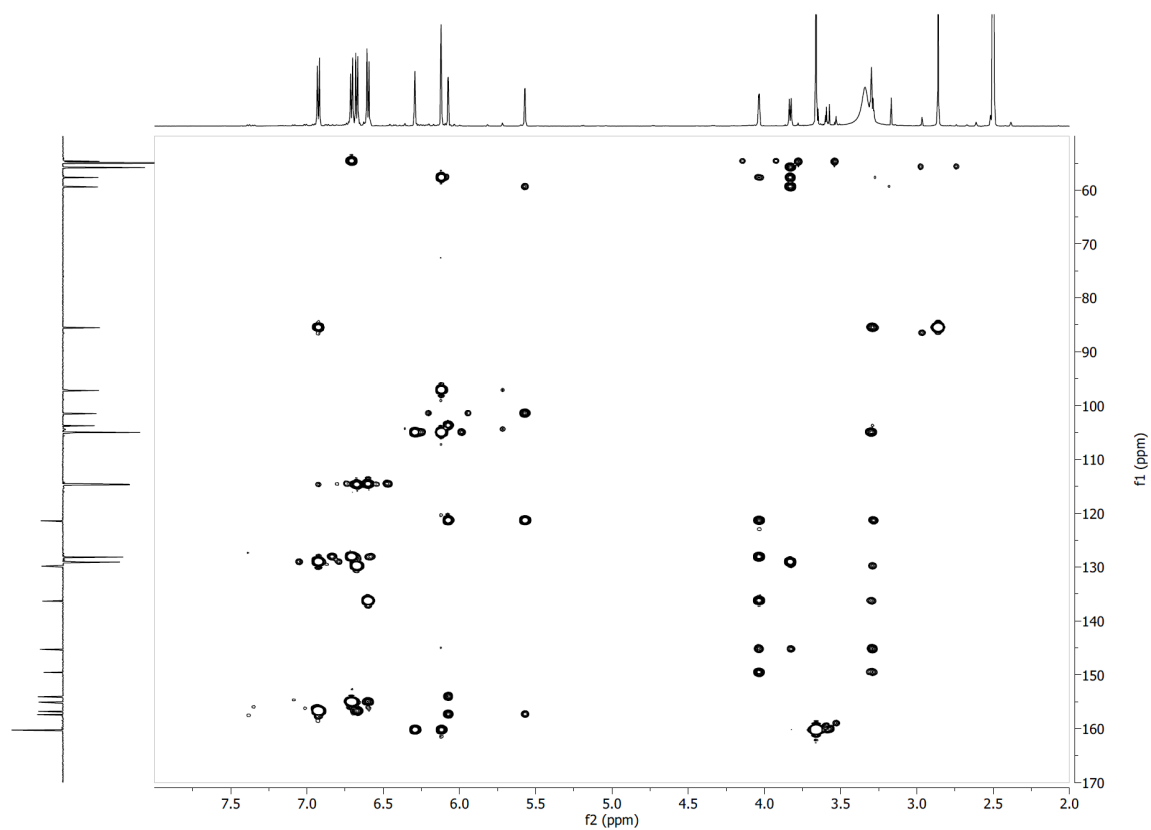

**Figure S30.** HMBC NMR spectrum of compound **8** in DMSO- $d_6$

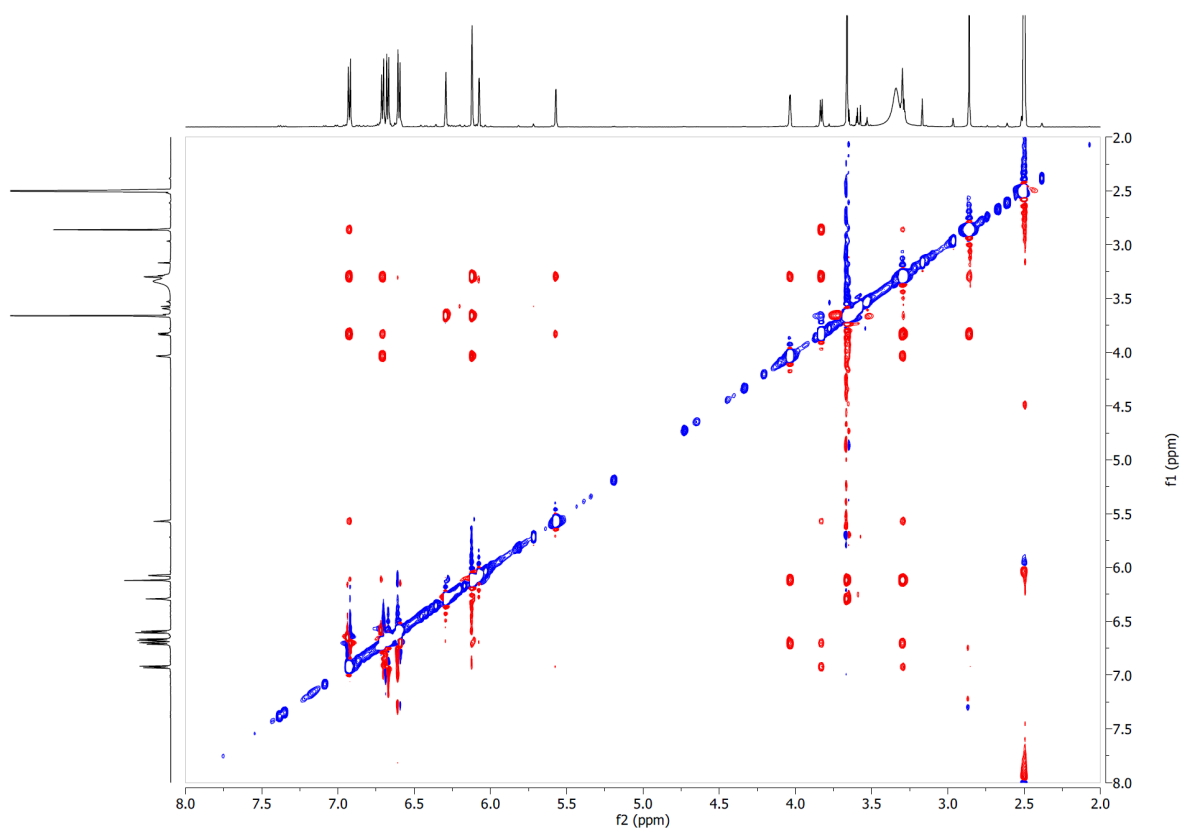

**Figure S31.** ROESY NMR spectrum of compound **8** in DMSO- $d_6$

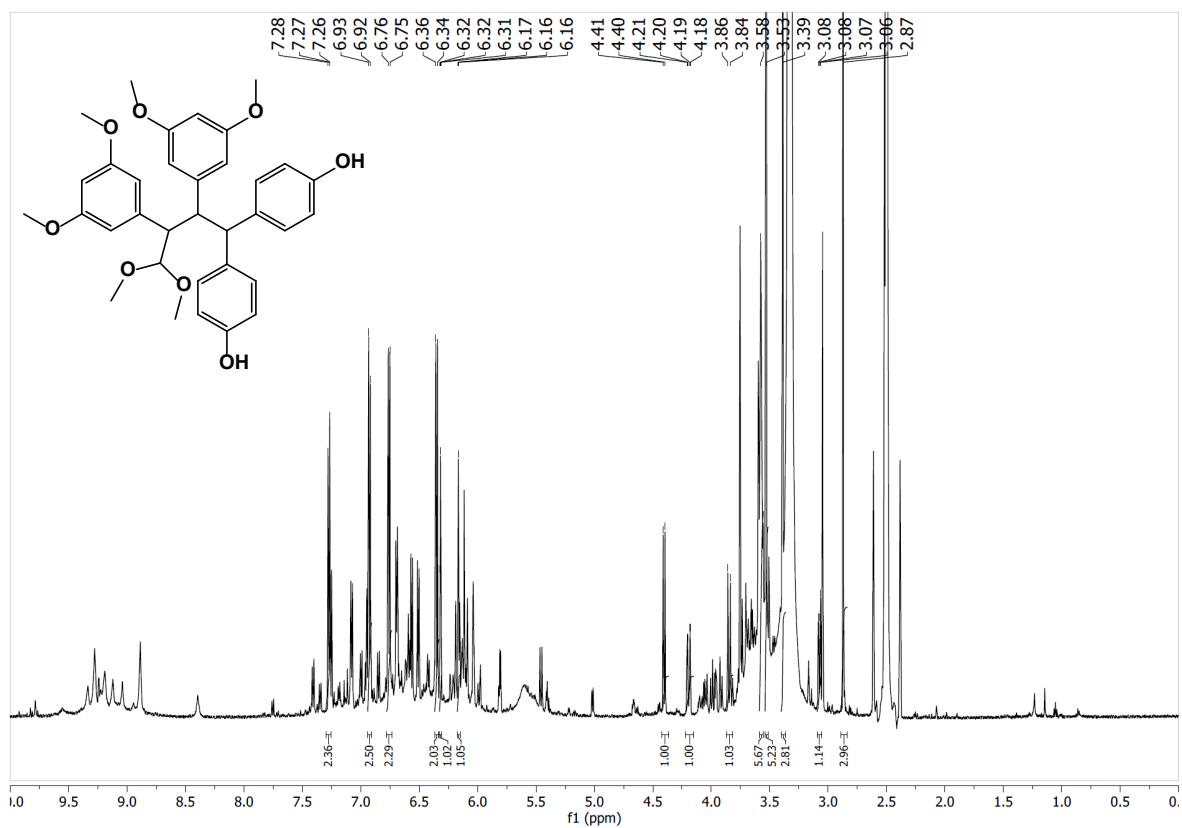

**Figure S32.**  $^1\text{H}$  NMR spectrum of compound **9** in DMSO- $d_6$  at 600 MHz

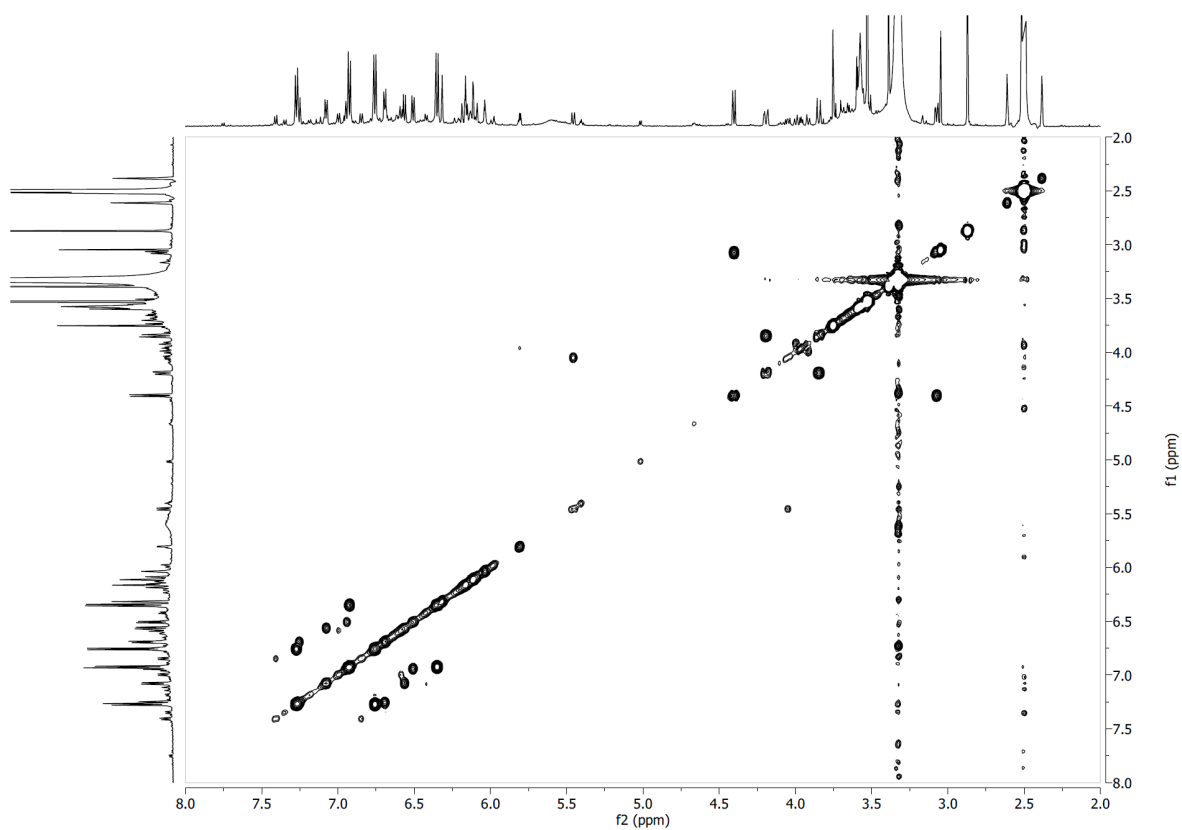

**Figure S33.** COSY NMR spectrum of compound **9** in DMSO- $d_6$

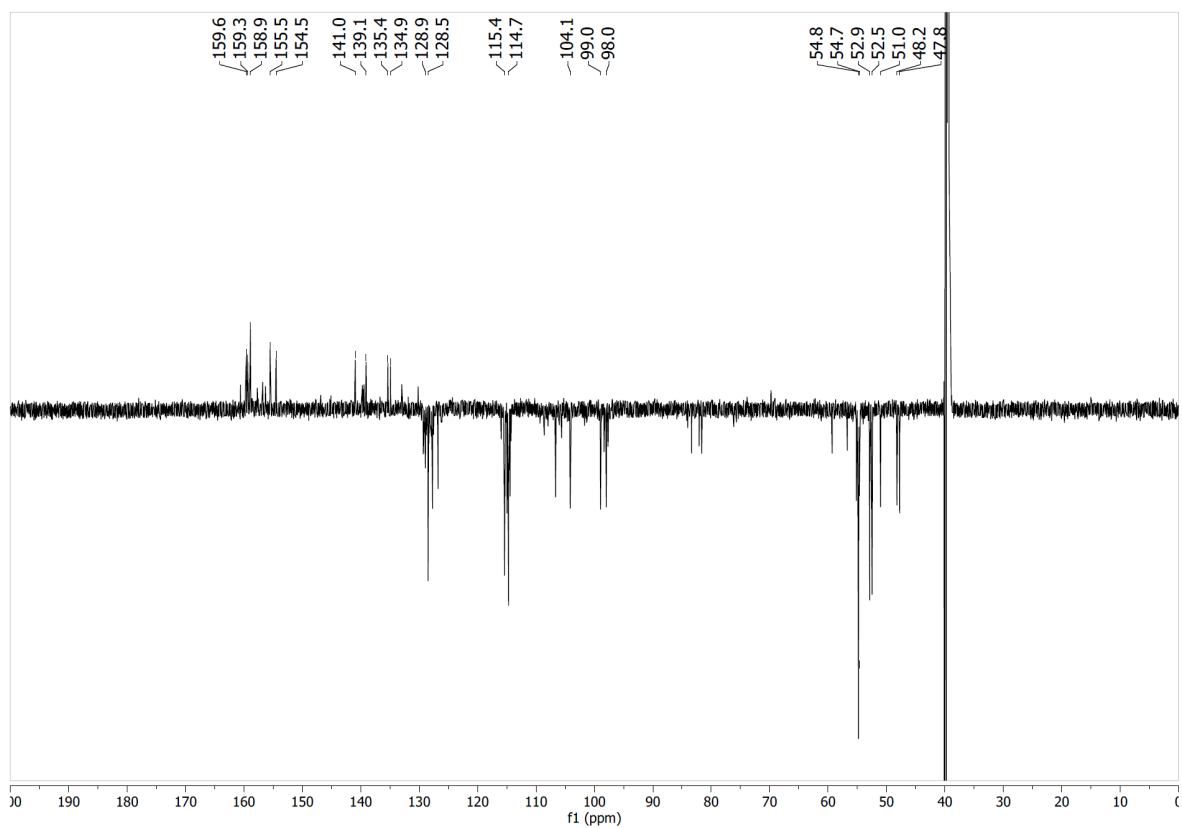

**Figure S34.**  $^{13}\text{C}$ -DEPTQ NMR spectrum of compound **9** in DMSO- $d_6$  at 151 MHz

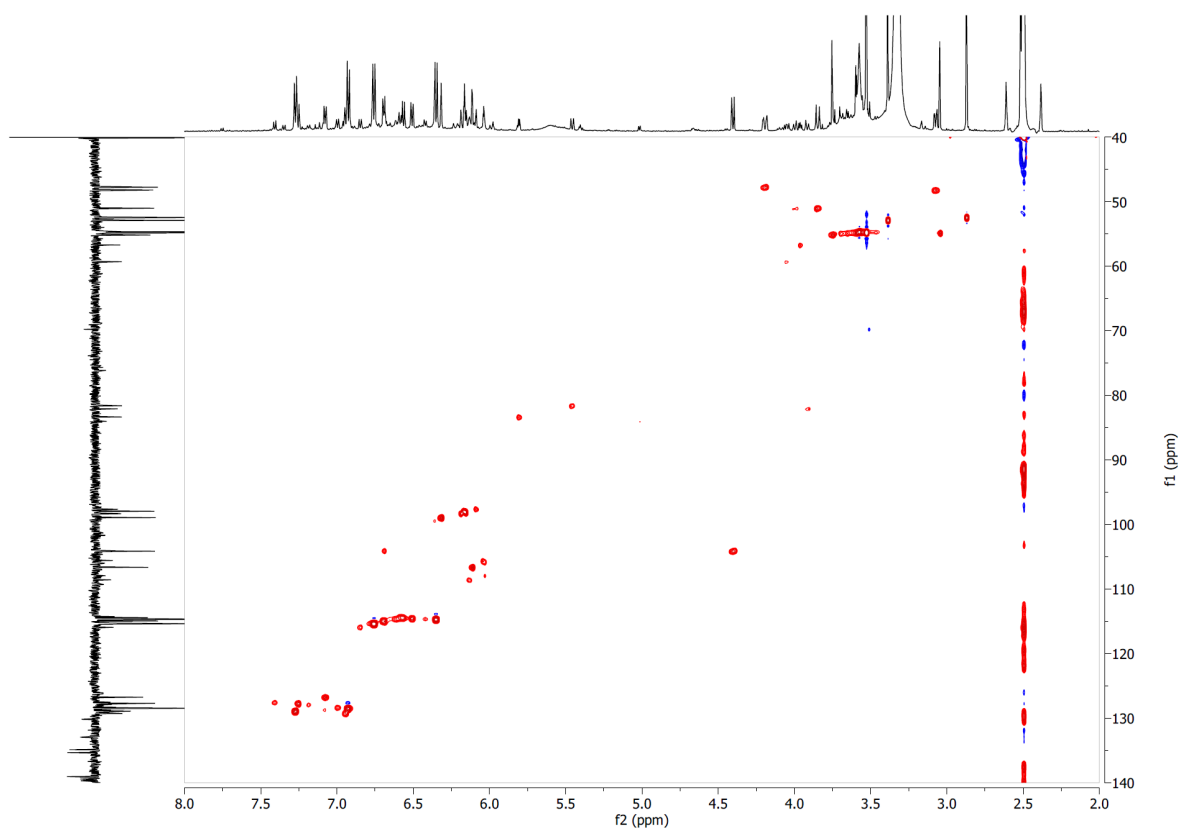

**Figure S35.** Edited-HSQC NMR spectrum of compound **9** in DMSO- $d_6$

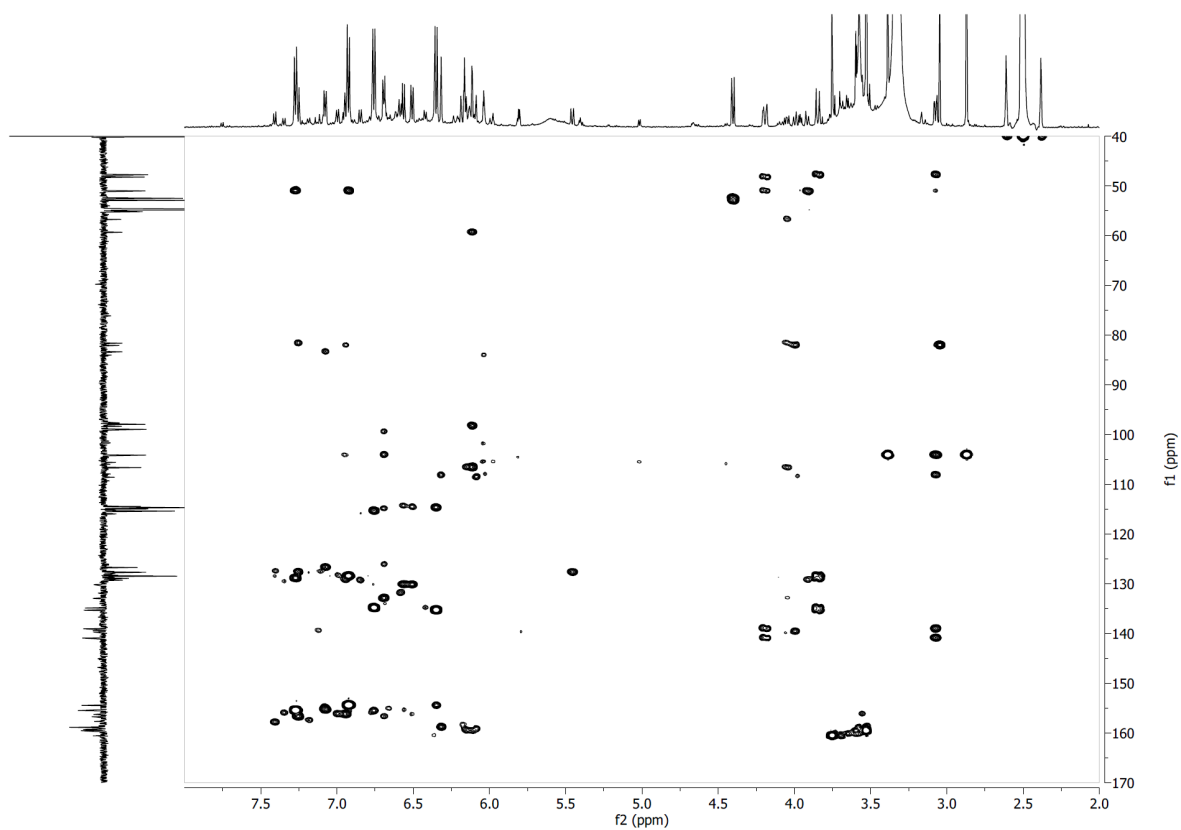

**Figure S36.** HMBC NMR spectrum of compound **9** in DMSO- $d_6$

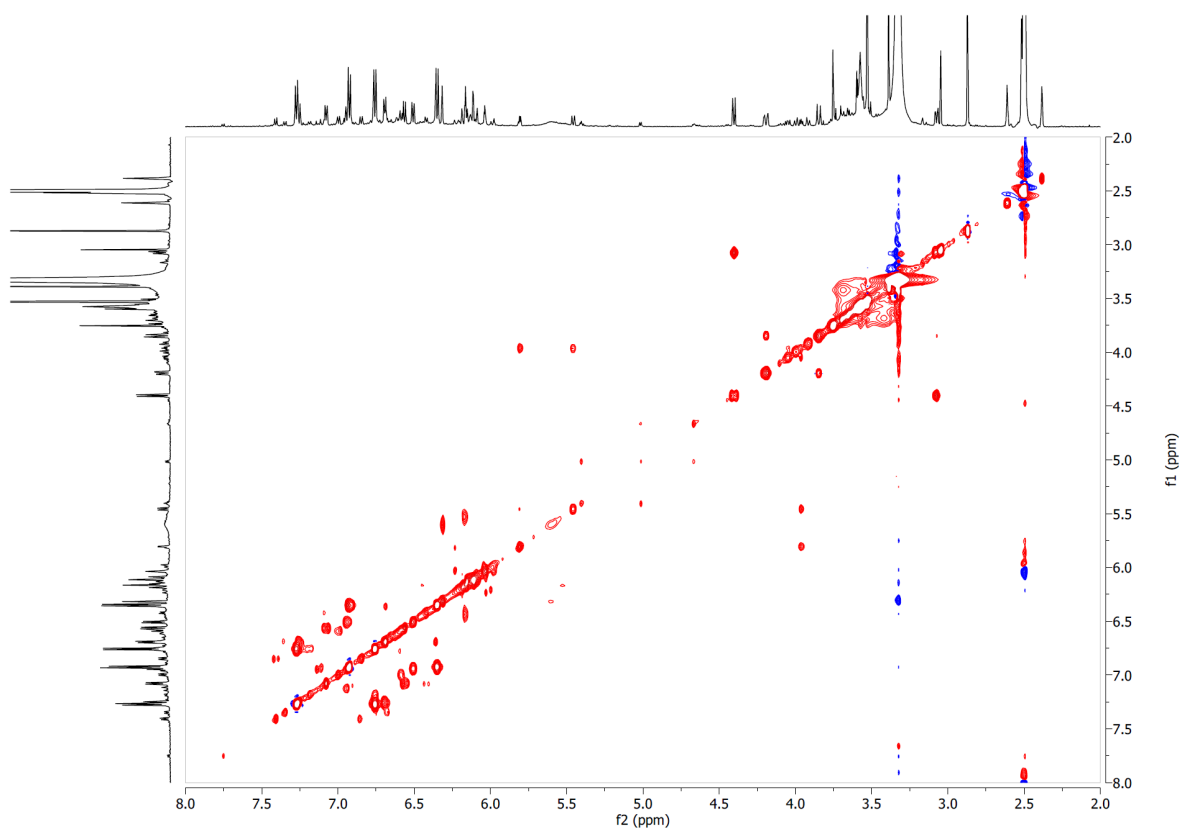

**Figure S37.** ROESY NMR spectrum of compound **9** in DMSO- $d_6$

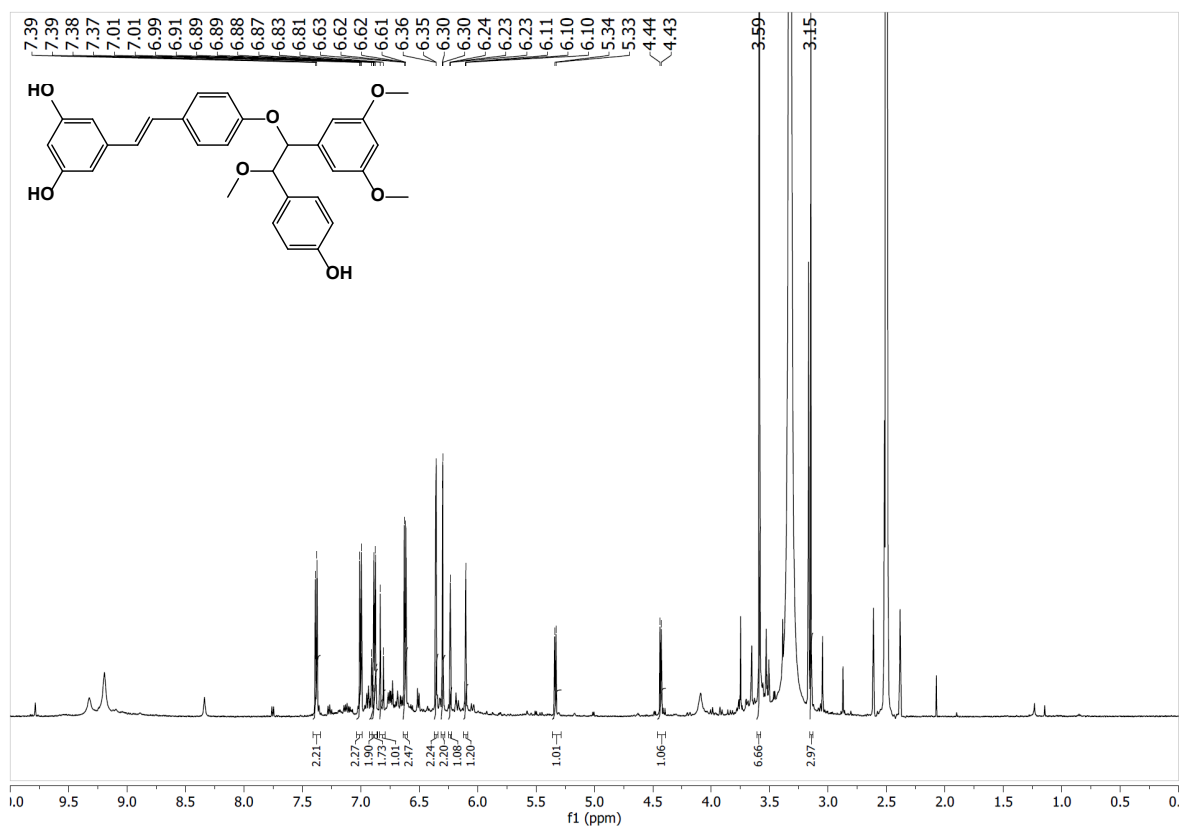

**Figure S38.**  $^1\text{H}$  NMR spectrum of compound **10** in DMSO- $d_6$  at 600 MHz

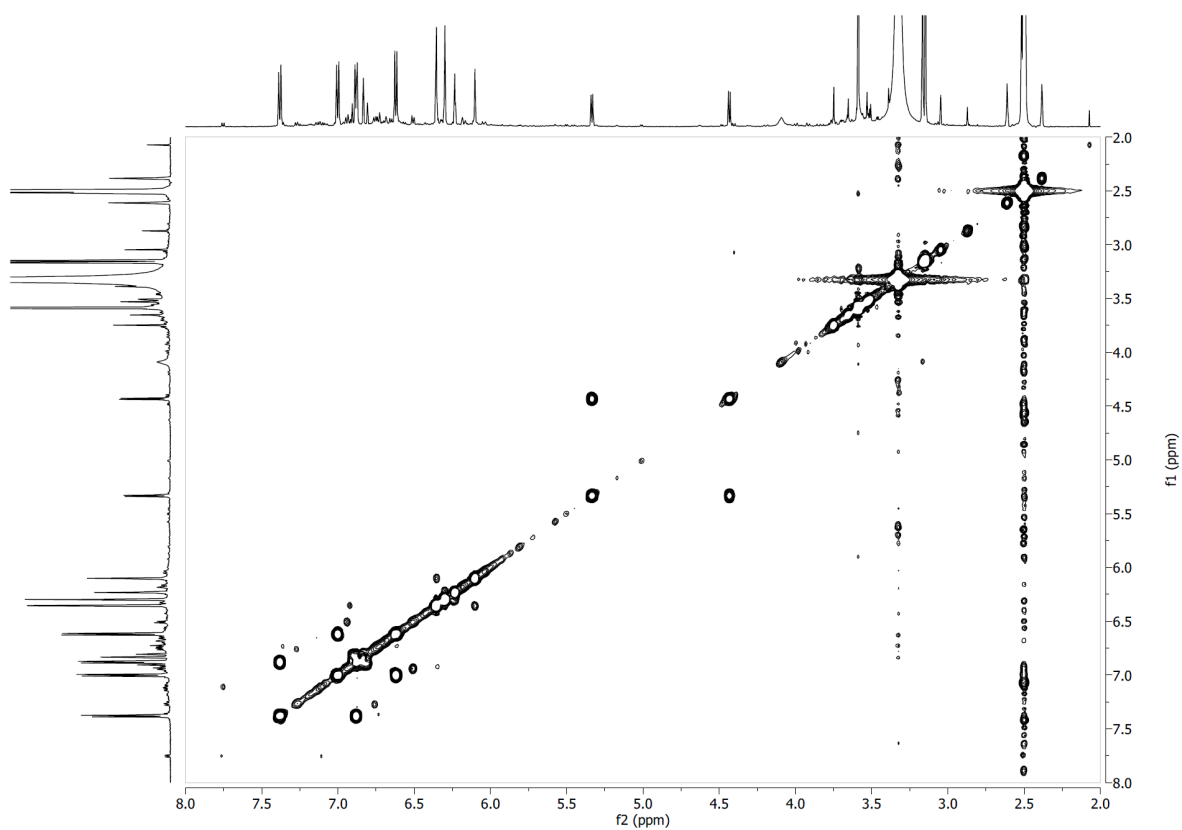

**Figure S39.** COSY NMR spectrum of compound **10** in DMSO- $d_6$

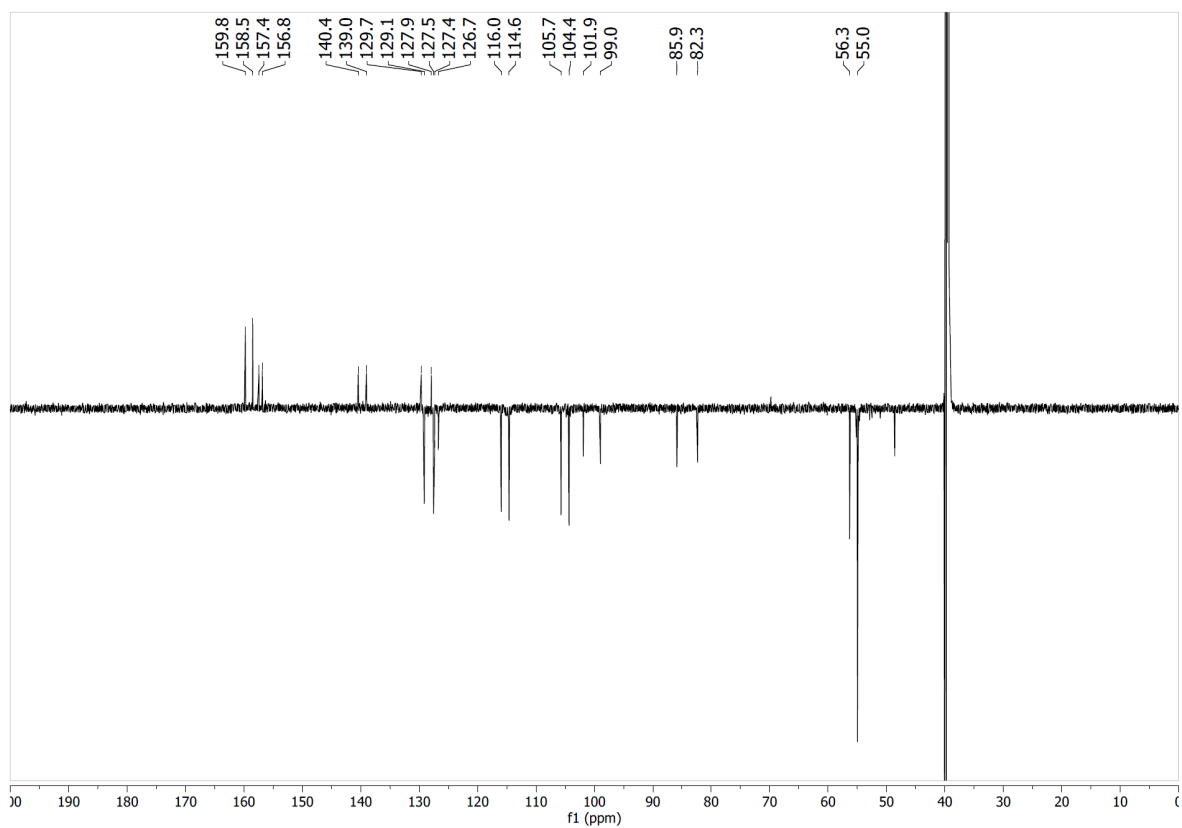

**Figure S40.**  $^{13}\text{C}$ -DEPTQ NMR spectrum of compound **10** in DMSO- $d_6$  at 151 MHz

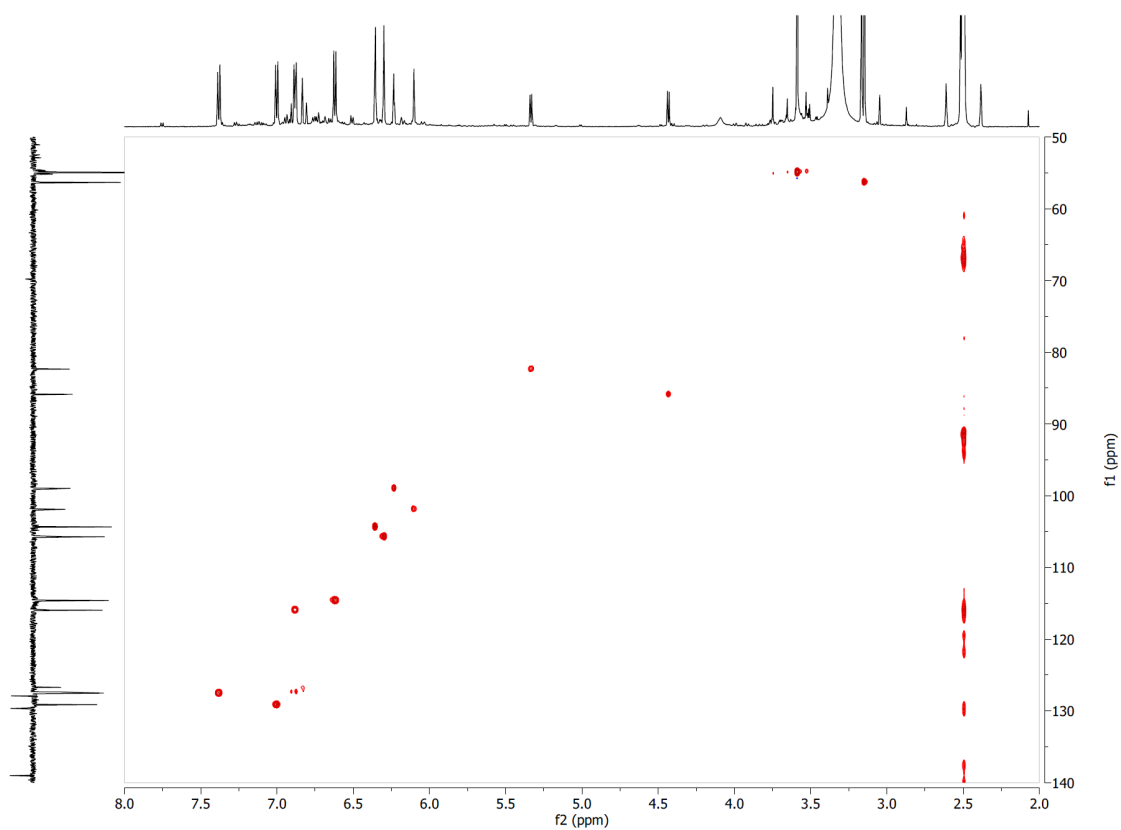

**Figure S41.** Edited-HSQC NMR spectrum of compound **10** in DMSO- $d_6$

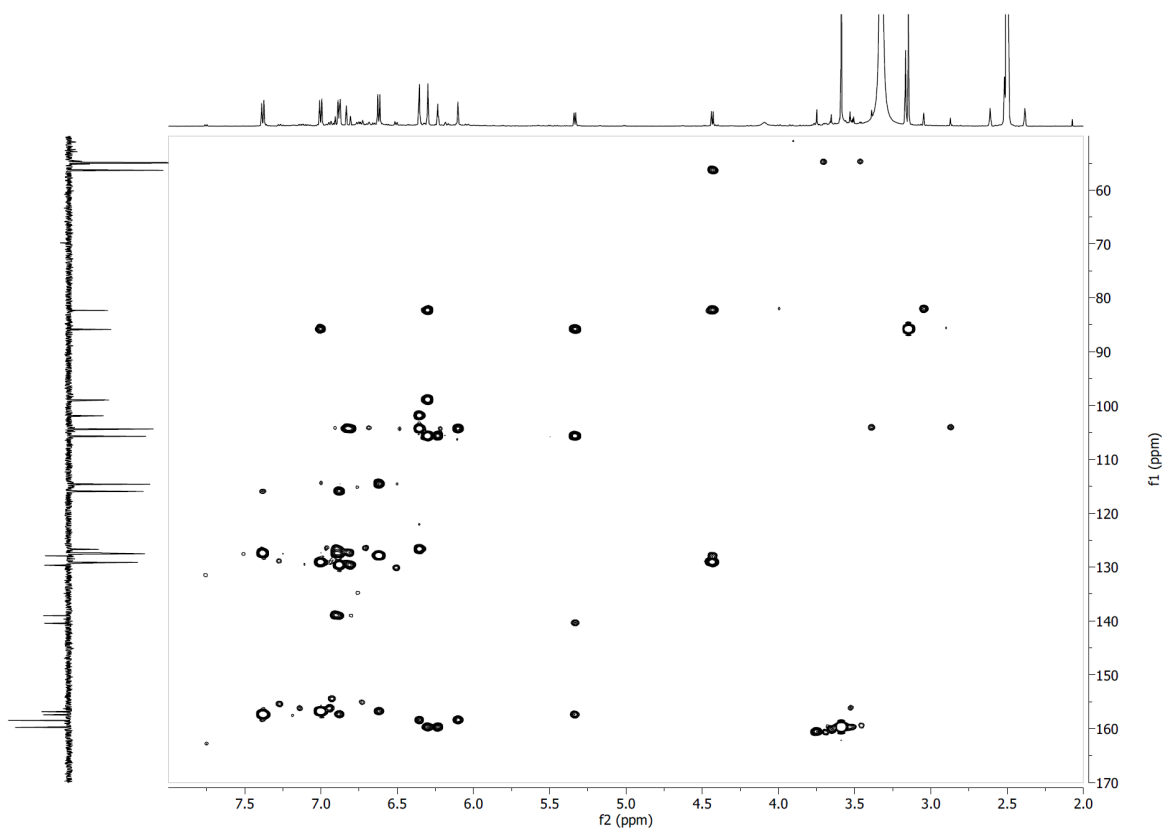

**Figure S42.** HMBC NMR spectrum of compound **10** in DMSO- $d_6$

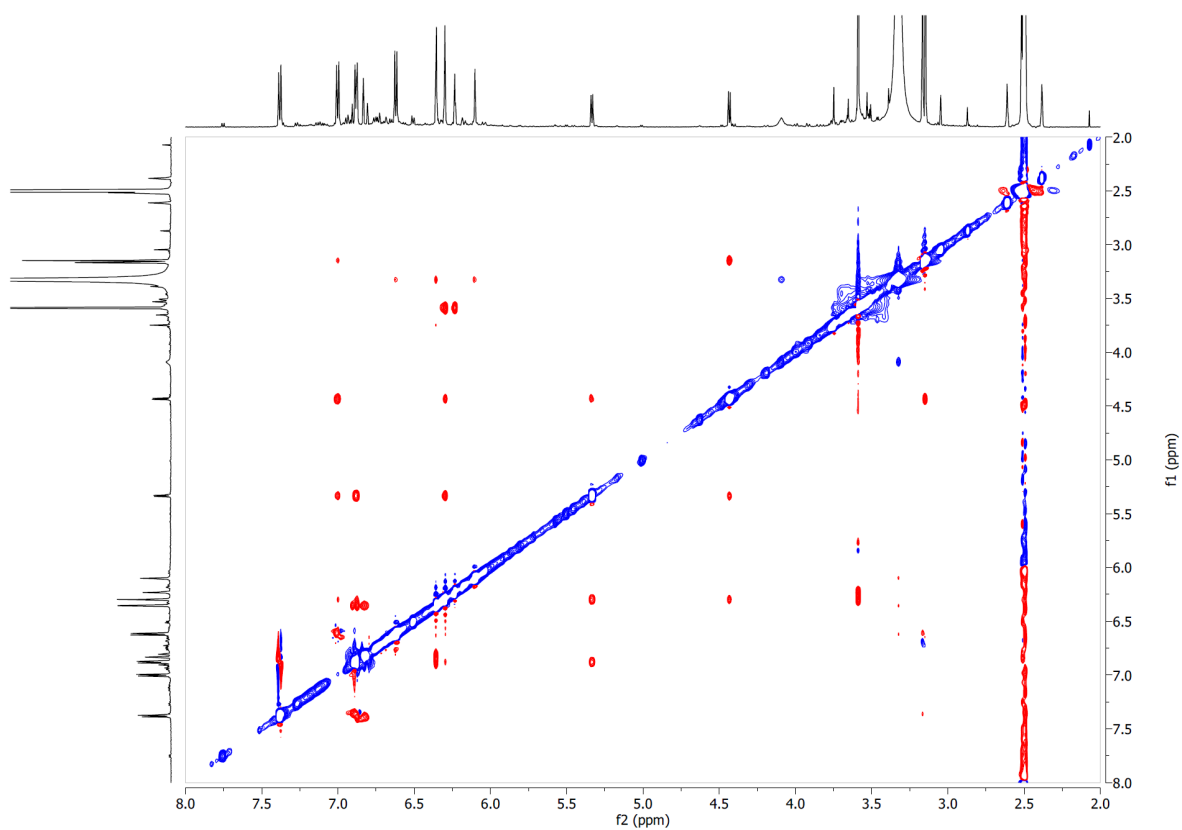

**Figure S43.** ROESY NMR spectrum of compound **10** in DMSO- $d_6$

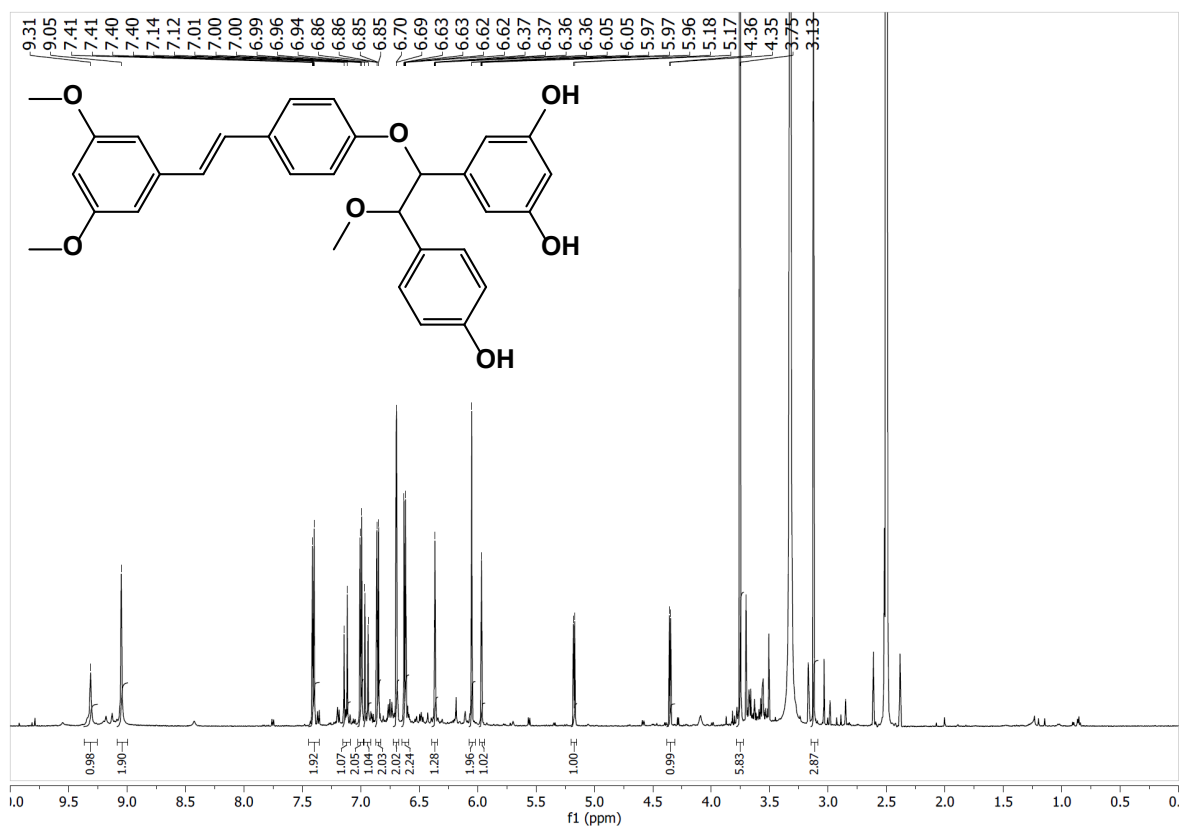

**Figure S44.**  $^1\text{H}$  NMR spectrum of compound **12** in DMSO- $d_6$  at 600 MHz

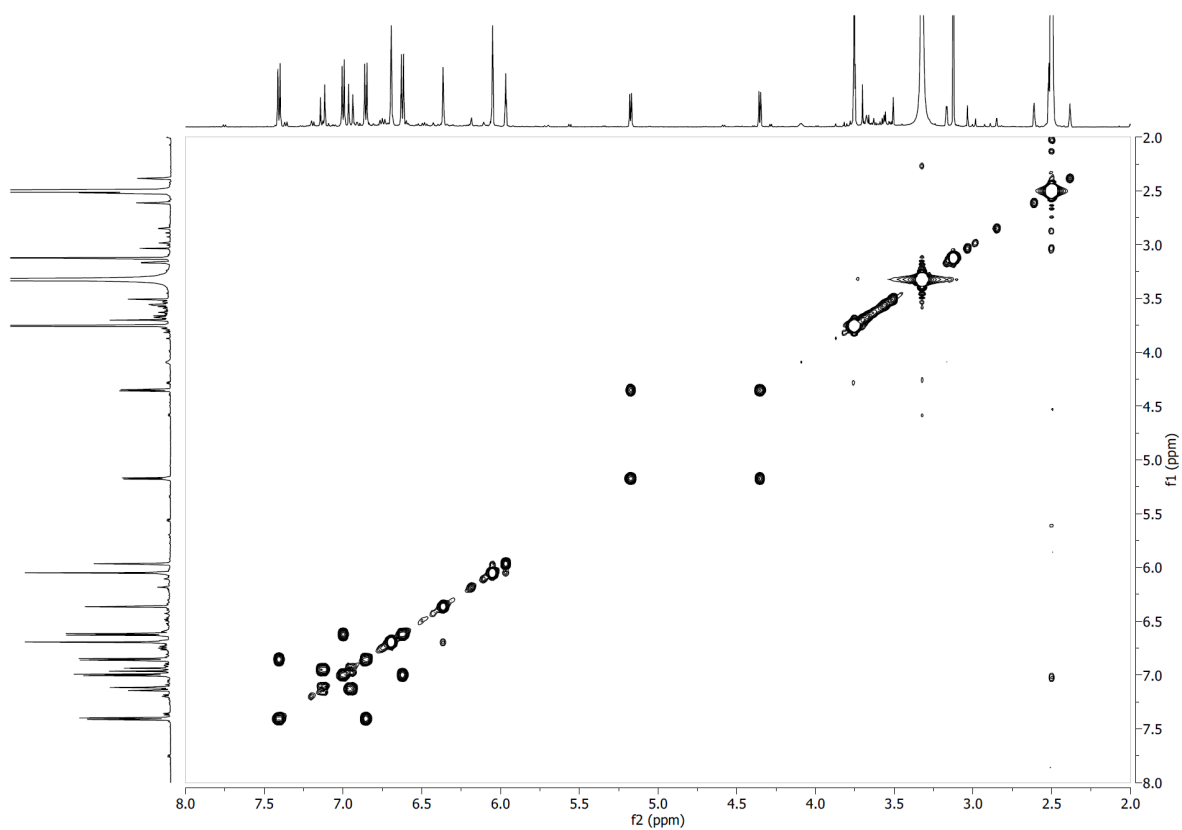

**Figure S45.** COSY NMR spectrum of compound **12** in DMSO- $d_6$

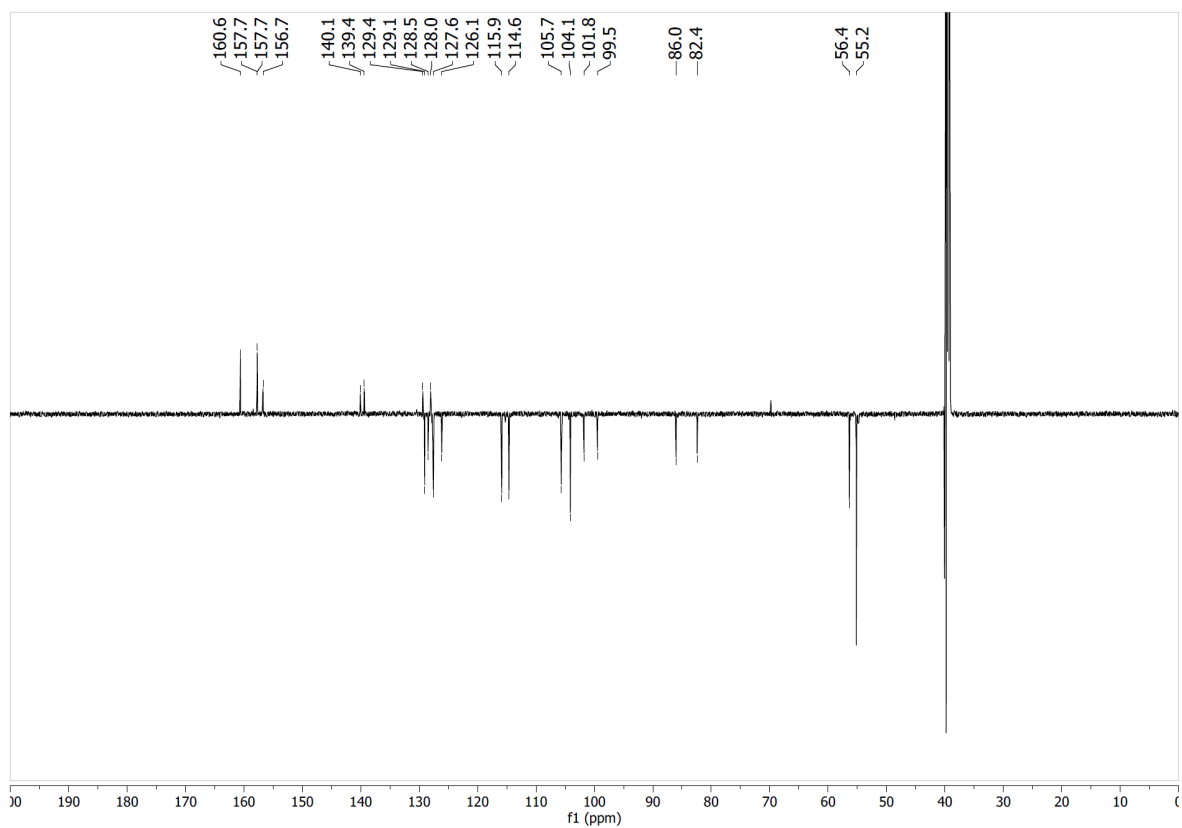

**Figure S46.**  $^{13}\text{C}$ -DEPTQ NMR spectrum of compound **12** in DMSO- $d_6$  at 151 MHz

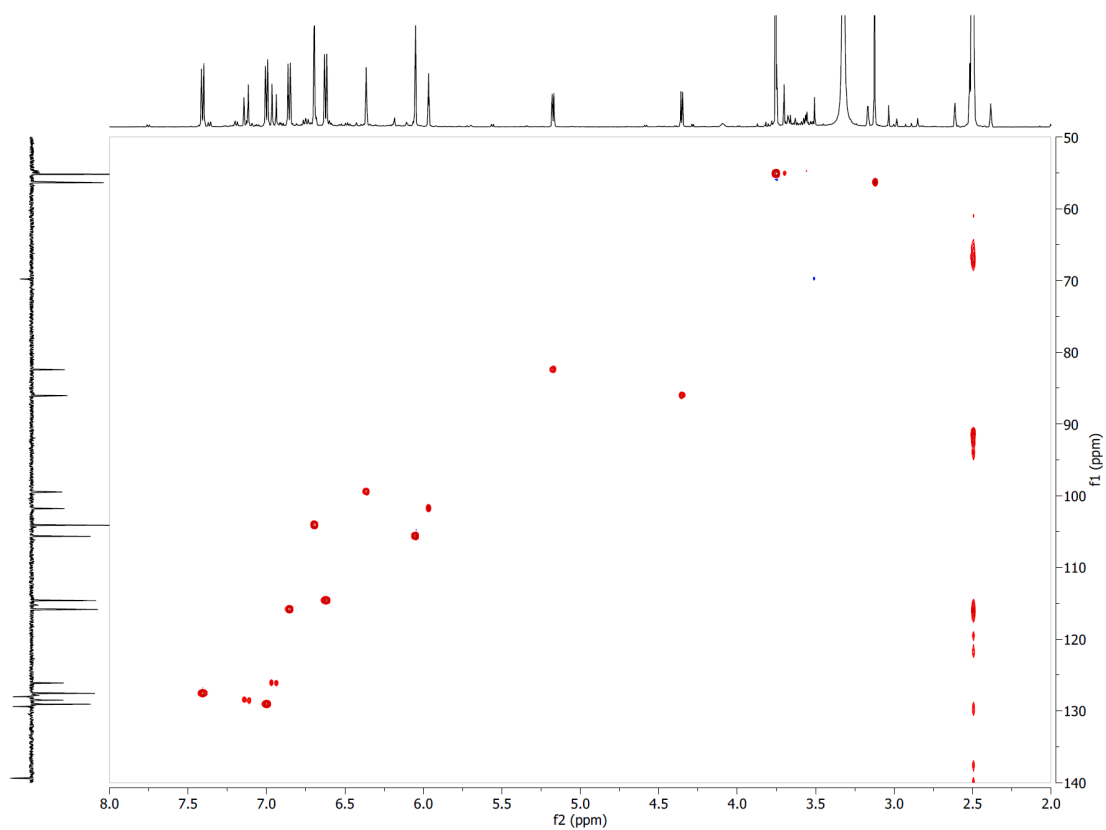

**Figure S47.** Edited-HSQC NMR spectrum of compound **12** in DMSO- $d_6$

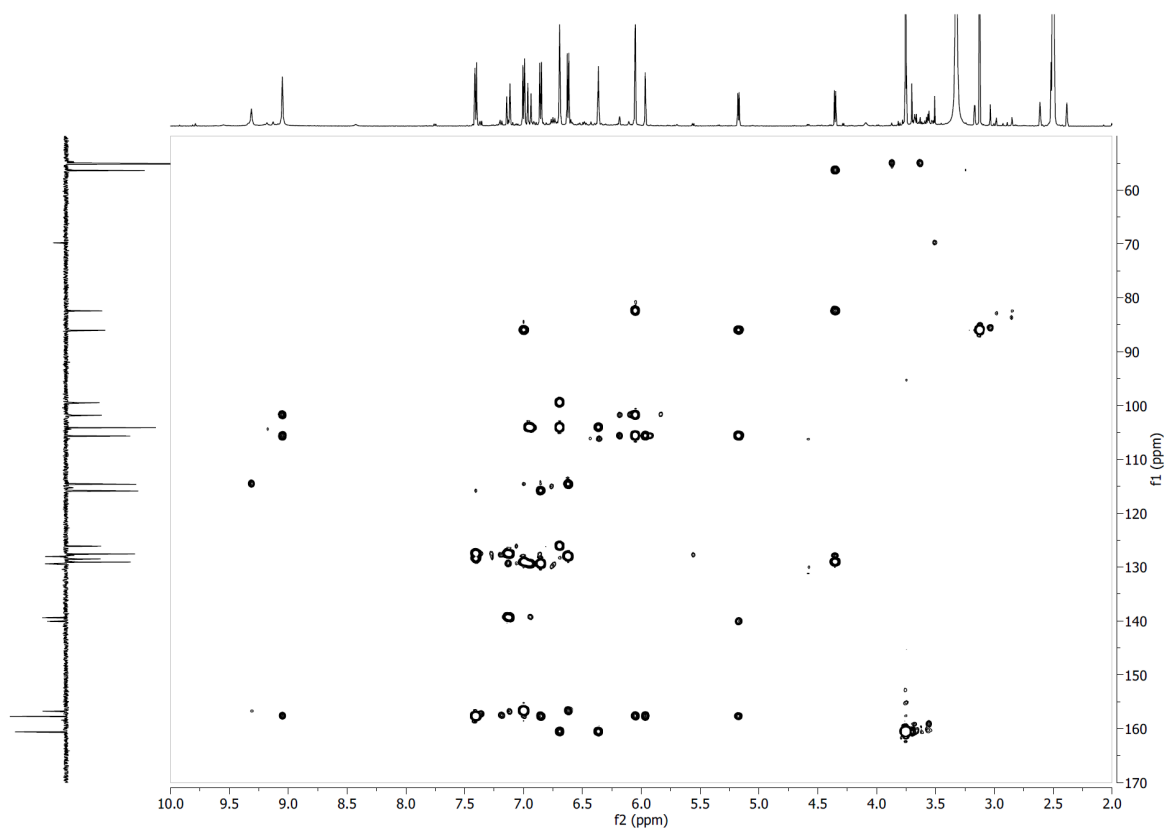

**Figure S48.** HMBC NMR spectrum of compound **12** in DMSO- $d_6$

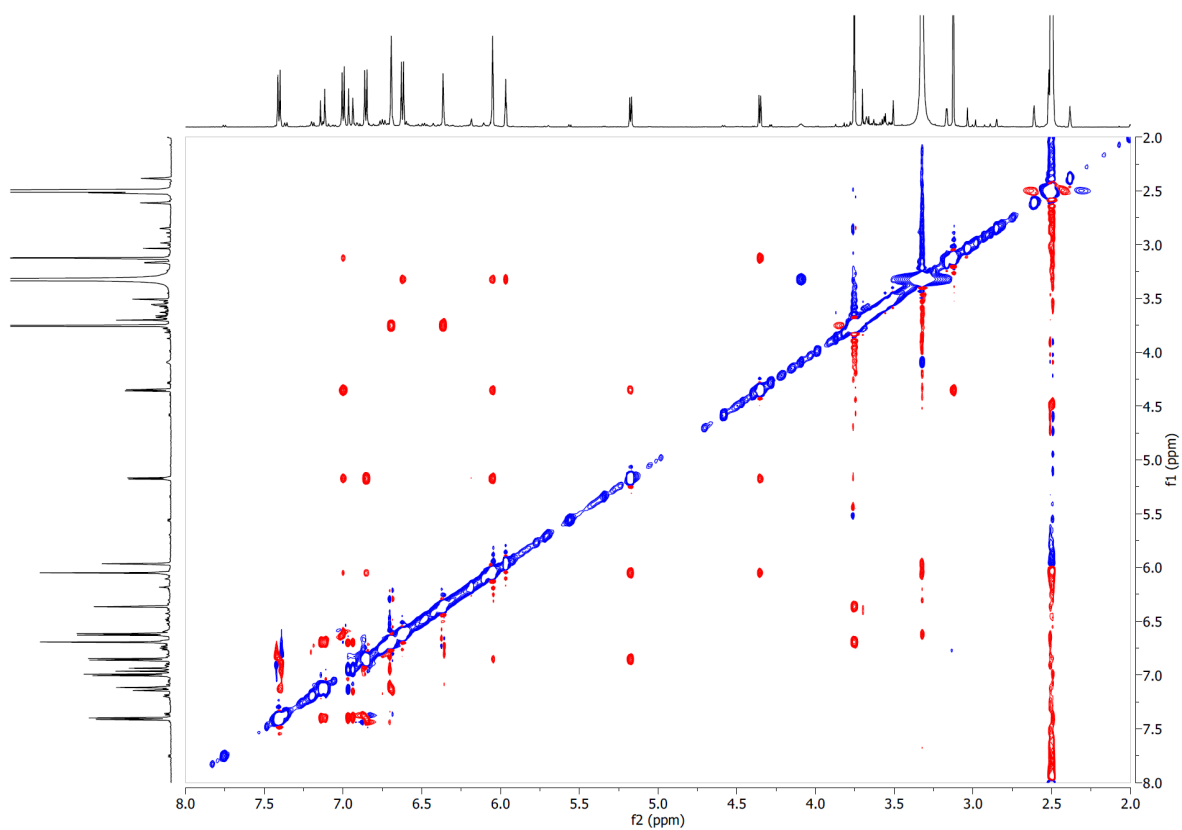

**Figure S49.** ROESY NMR spectrum of compound **12** in DMSO- $d_6$

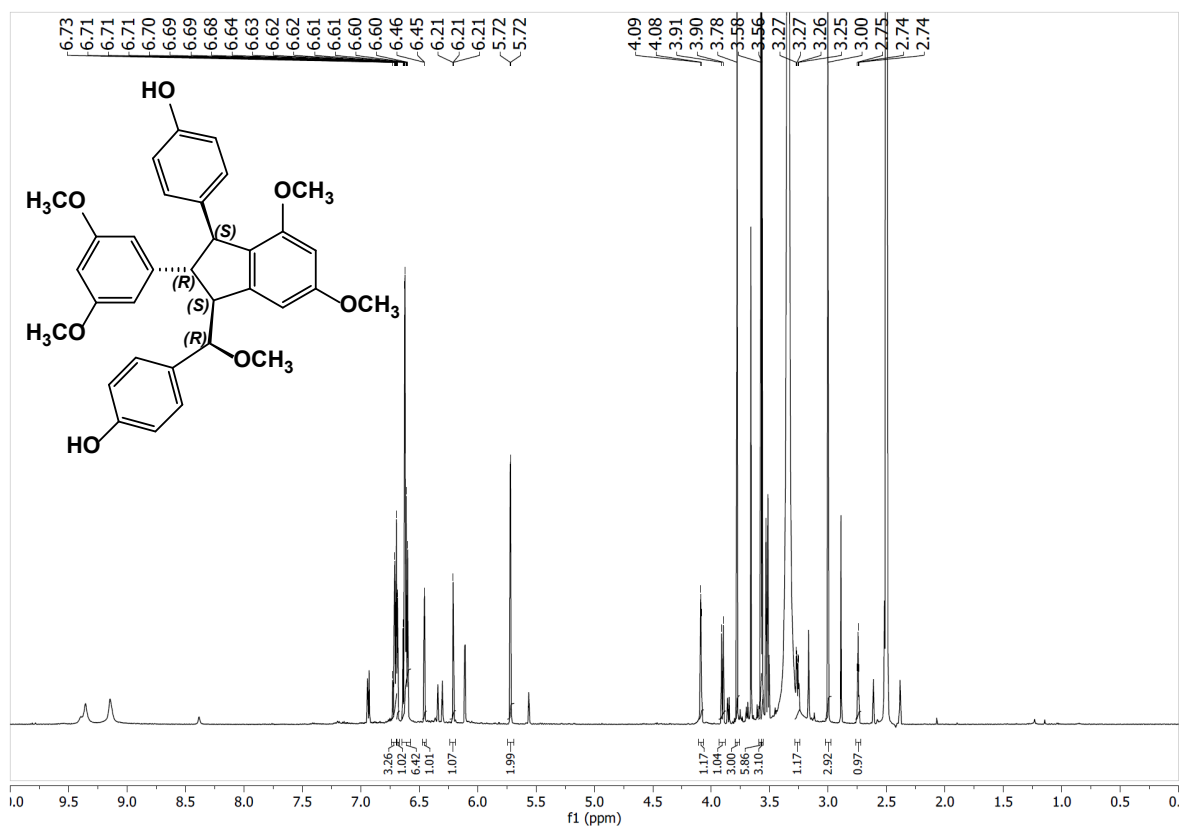

**Figure S50.**  $^1\text{H}$  NMR spectrum of compound **13** in DMSO- $d_6$  at 600 MHz

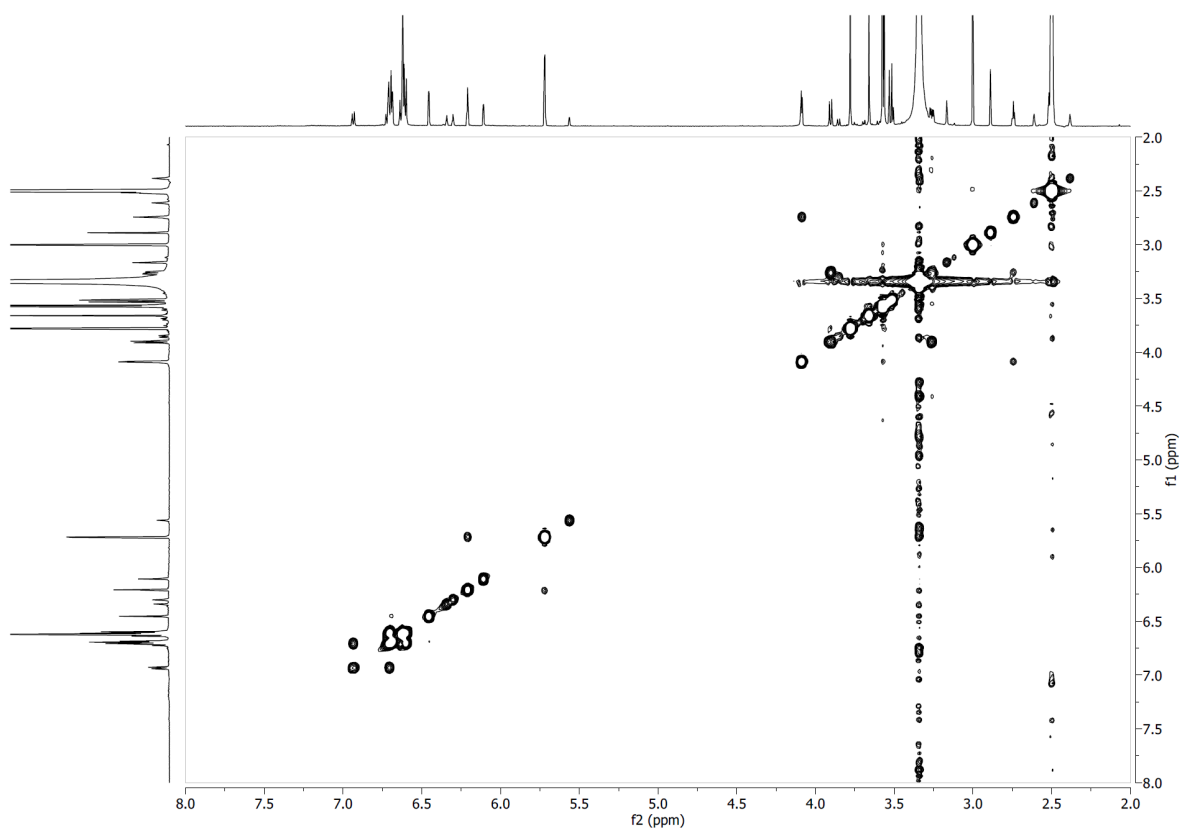

**Figure S51.** COSY NMR spectrum of compound **13** in DMSO- $d_6$

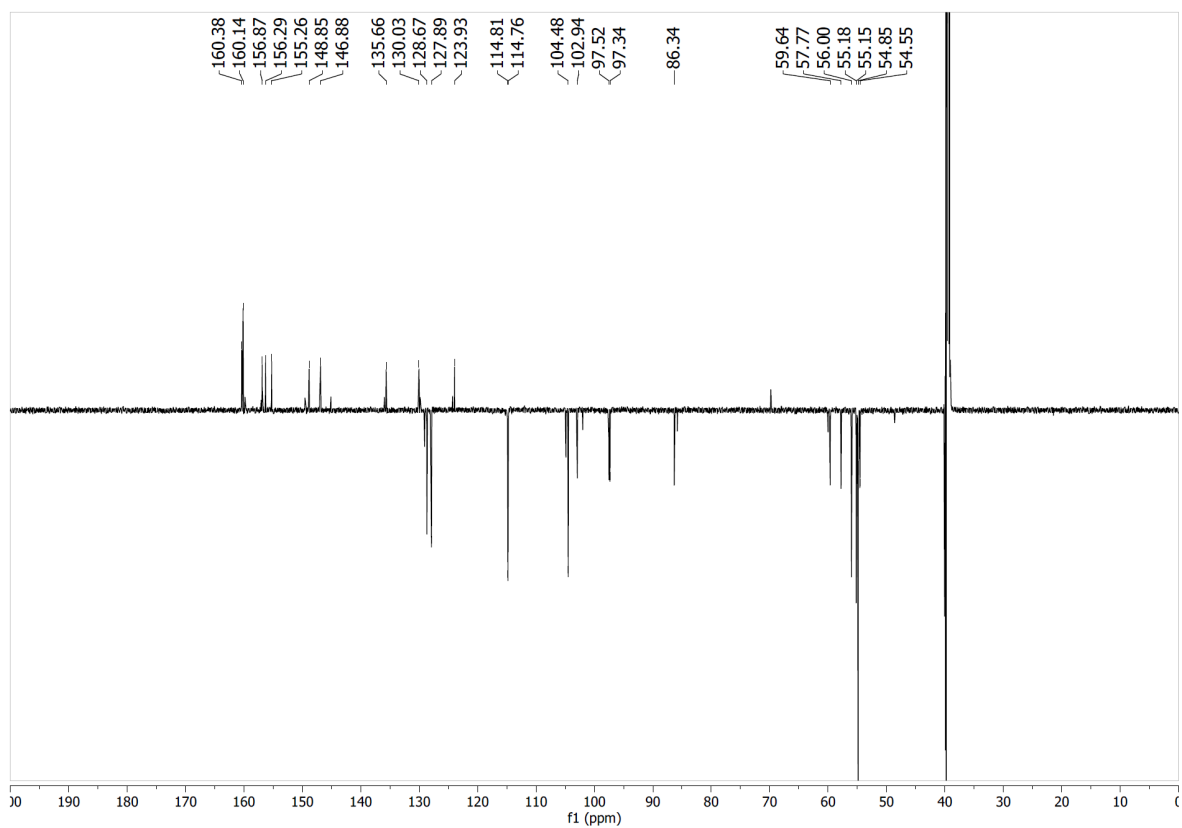

**Figure S52.**  $^{13}\text{C}$ -DEPTQ NMR spectrum of compound **13** in DMSO- $d_6$  at 151 MHz

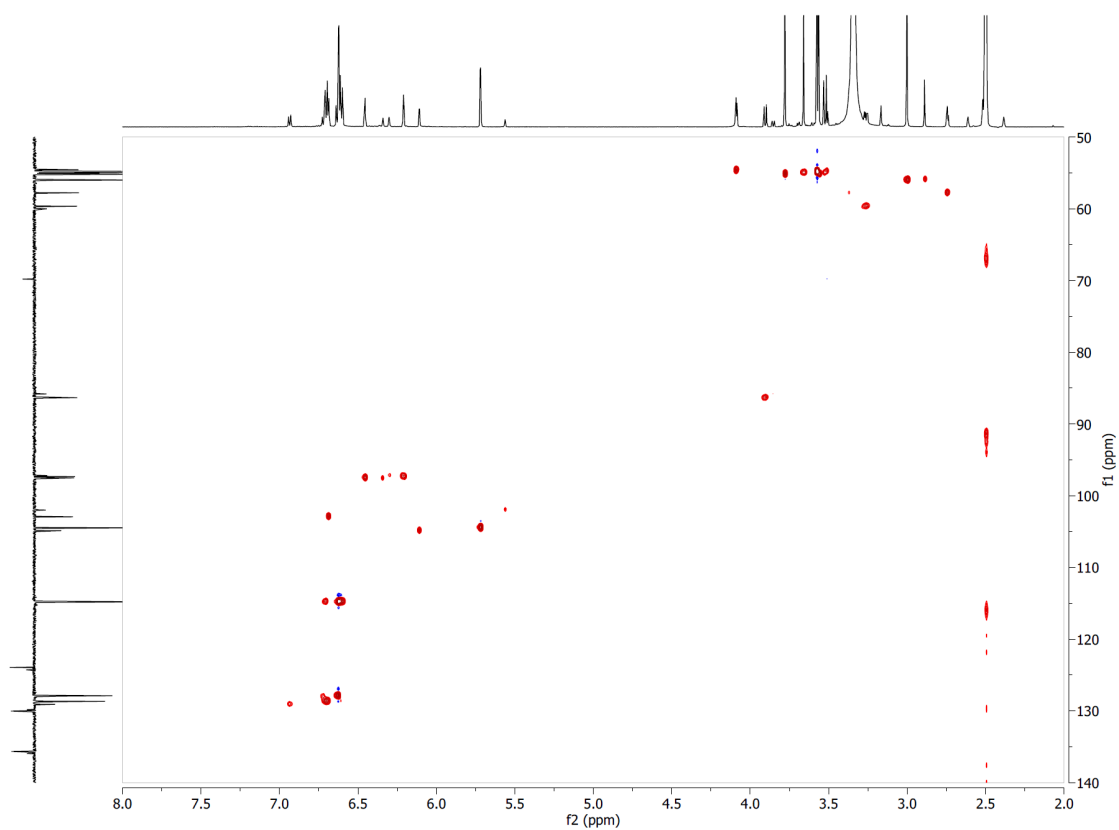

**Figure S53.** Edited-HSQC NMR spectrum of compound **13** in DMSO- $d_6$

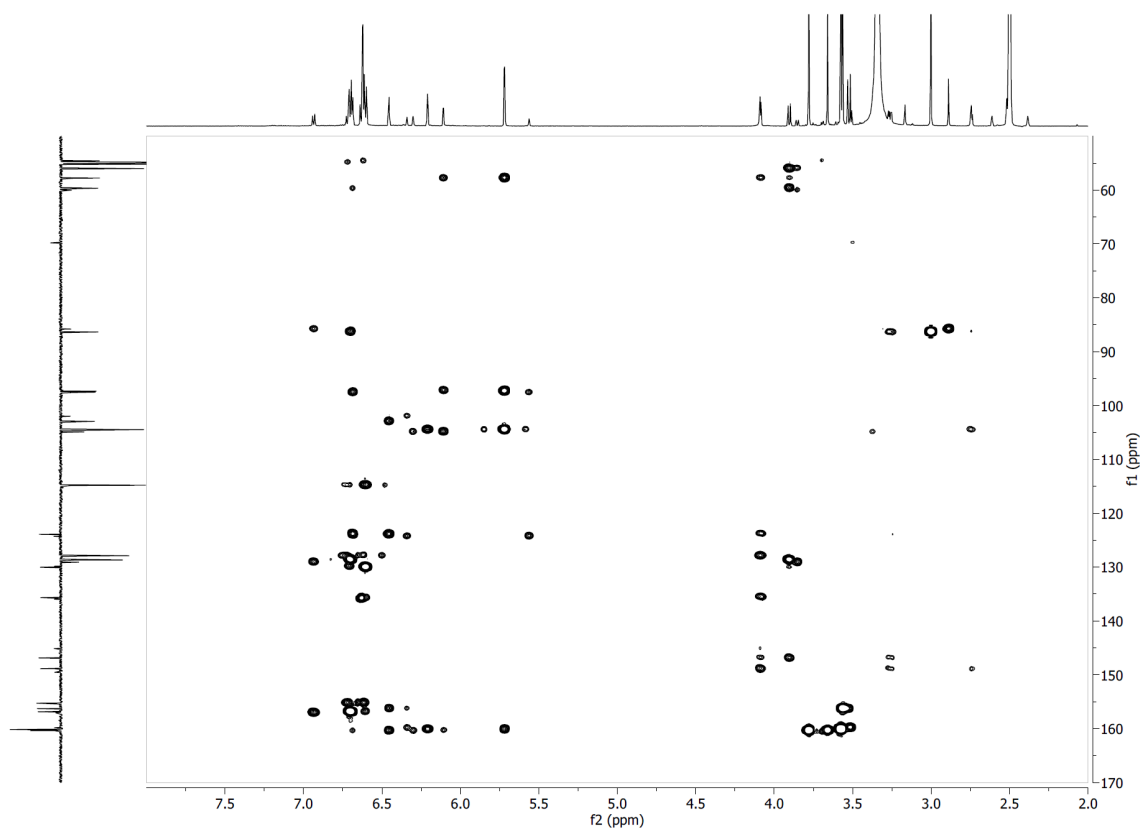

**Figure S54.** HMBC NMR spectrum of compound **13** in DMSO- $d_6$

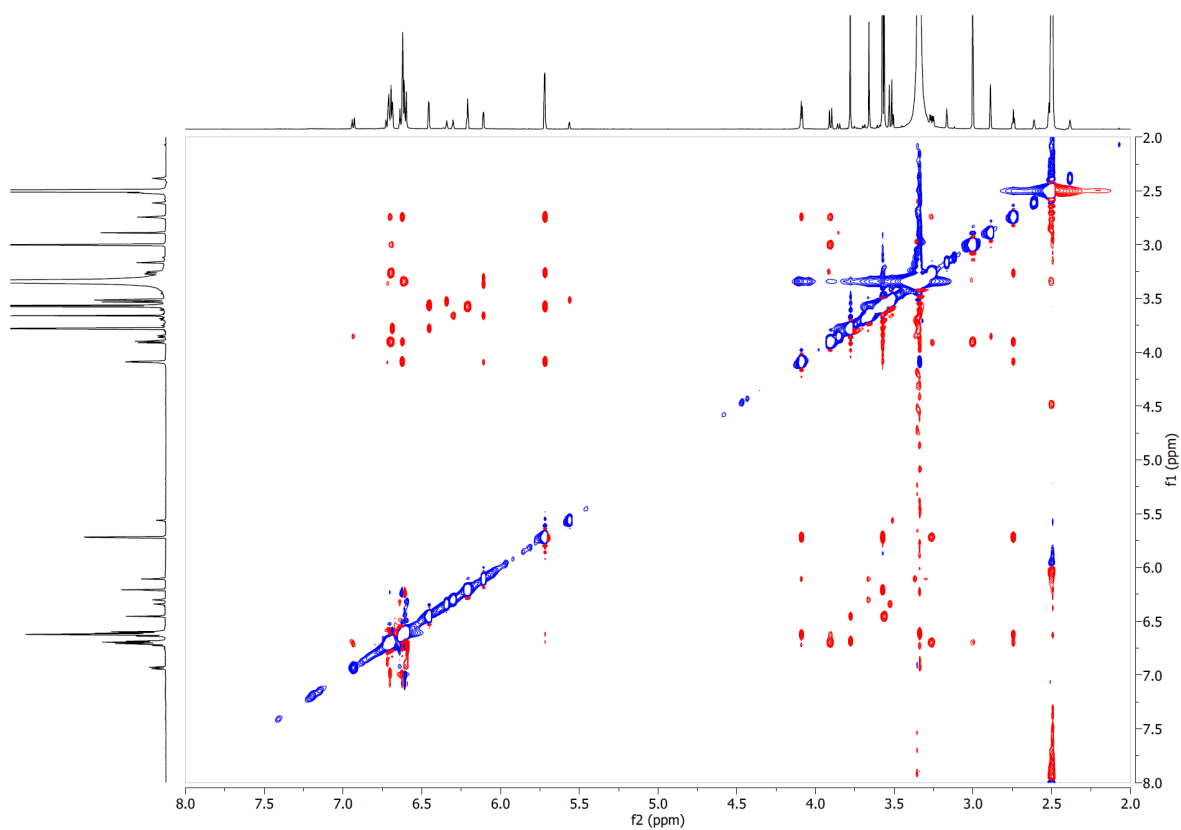

**Figure S55.** ROESY NMR spectrum of compound **13** in DMSO- $d_6$

**Table S1.** Detailed composition of analytical scale reactions.

| % Organic solvent | V. stock solution (μl) | V. Org. solvent (μL) | V. water (μL) | V. secretome (μL) |
|-------------------|------------------------|----------------------|---------------|-------------------|
| <b>2%</b>         | 25                     | 20                   | 960           | 20                |
| <b>10%</b>        | 25                     | 100                  | 880           | 20                |
| <b>30%</b>        | 25                     | 300                  | 680           | 20                |
| <b>50%</b>        | 25                     | 500                  | 480           | 20                |
| <b>70%</b>        | 25                     | 700                  | 280           | 20                |
| <b>90%</b>        | 25                     | 900                  | 80            | 20                |
| <b>98%</b>        | 25                     | 980                  | 0             | 20                |
